1 Improving estimates of epidemiological quantities by combining  
2 reported cases with wastewater data: a statistical framework  
3 with applications to COVID-19 in Aotearoa New Zealand

4 Leighton M. Watson<sup>1</sup>, Michael J. Plank<sup>1</sup>, Bridget A. Armstrong<sup>2</sup>, Joanne R. Chapman<sup>2</sup>,  
5 Joanne Hewitt<sup>2</sup>, Helen Morris<sup>2</sup>, Alvaro Orsi<sup>2</sup>, Michael Bunce<sup>2,3</sup>, Christl A. Donnelly<sup>4,5</sup>,  
6 and Nicholas Steyn<sup>4</sup>

7 <sup>1</sup>School of Mathematics and Statistics, University of Canterbury, New Zealand

8 <sup>2</sup>Institute of Environmental Science and Research Ltd, New Zealand

9 <sup>3</sup>Department of Conservation, New Zealand

10 <sup>4</sup>Department of Statistics, University of Oxford, United Kingdom

11 <sup>5</sup>Pandemic Sciences Institute, University of Oxford, United Kingdom

12

## Abstract

13

**Background:** Timely and informed public health responses to infectious diseases such as COVID-19 necessitate reliable information about infection dynamics. The case ascertainment rate (CAR), the proportion of infections that are reported as cases, is typically much less than one and varies with testing practices and behaviours, making reported cases unreliable as the sole source of data. The concentration of viral RNA in wastewater samples provides an alternate measure of infection prevalence that is not affected by human behaviours. Here, we investigated how these two data sources can be combined to inform estimates of the instantaneous reproduction number,  $R$ , and track changes in the CAR over time.

14

**Methods:** We constructed a state-space model that we solved using sequential Monte Carlo methods. The observed data are the levels of SARS-CoV-2 in wastewater and reported case incidence. The hidden states that we estimate are  $R$  and CAR. Model parameters are estimated using the particle marginal Metropolis Hastings algorithm.

15

**Findings:** We analysed data from 1 January 2022 to 31 March 2023 from Aotearoa New Zealand. Our model estimates that  $R$  peaked at 2.76 (95% CrI 2.20, 3.83) around 18 February 2022 and the CAR peaked around 12 March 2022. Accounting for reduced CAR, we estimate that New Zealand's second Omicron wave in July 2022 was similar in size to the first, despite fewer reported cases. We estimate that the CAR in the BA.5 Omicron wave in July 2022 was approximately 50% lower than in the BA.1/BA.2 Omicron wave in March 2022. The CAR in subsequent waves around November 2022 and April 2023 was estimated to be comparable to that in the second Omicron wave.

16

**Interpretation:** This work on wastewater-based epidemiology (WBE) can be used to give insight into key epidemiological quantities. Estimating  $R$ , CAR, and cumulative number of infections provides useful information for planning public health responses and understanding the state of immunity in the population. This model is a useful disease surveillance tool, improving situational awareness of infectious disease dynamics in real-time, which may be increasingly useful as intensive pandemic surveillance programmes are wound down.

17

**Funding:** New Zealand Ministry of Health, Department of Prime Minister and Cabinet, the Royal Society Te Apārangi, Imperial College London, and University of Oxford.

18

## 43 **Research in Context**

### 44 **Evidence before this study**

45 There has been a substantial increase in the number of publications focusing on wastewater-  
46 based epidemiology (WBE) in recent years, particularly during the COVID-19 pandemic. We  
47 searched PubMed for “wastewater based epidemiology” and found fewer than 10 papers per  
48 year prior to 2014 with a drastic increase to 463 in 2022. Approximately 52% of the WBE  
49 publications are related to COVID-19 (“wastewater based epidemiology” AND (“SARS-CoV-  
50 2” OR “COVID-19”)). Many studies have focused on detecting SARS-CoV-2 in wastewater  
51 systems but only 10 have estimated the reproduction number (“wastewater based epidemiology”  
52 AND (“SARS-CoV-2” OR “COVID-19”) AND “reproduction number”). No previous work has  
53 combined WBE with reported case data to estimate (relative) case ascertainment rate (“waste-  
54 water based epidemiology” AND (“SARS-CoV-2” OR “COVID-19”) AND “case ascertainment  
55 rate”). Previous work has estimated the reproduction number from reported cases assuming  
56 constant under-ascertainment but the issue of time-varying case ascertainment has not yet been  
57 addressed, except to demonstrate the effect of a pre-determined change in case ascertainment.

### 58 **Added value of this study**

59 We present a model that, for the first time, enables reported case information to be combined  
60 with wastewater data to estimate epidemiology quantities. This work further demonstrates the  
61 utility of WBE; the reproduction number can be estimated in the absence of reported case  
62 information (although results are more reliable when case data are included), and wastewater  
63 data include information that, when combined with case data, can be used to estimate the  
64 time-varying relative case ascertainment rate.

### 65 **Implications of all the available evidence**

66 In order to make informed and timely public health decisions about infectious diseases, it is  
67 important to understand the number of infections in the community. WBE provides a useful  
68 source of data that is not impacted by time-varying testing practices. Wastewater data can be  
69 quantitatively combined with case information to better understand the state of an epidemic. In  
70 order to determine the absolute case ascertainment rate (rather than the relative rate calculated  
71 in this work), there is a need for infection prevalence surveys to calibrate model results against.

## 72 1 Introduction

73 Understanding and predicting the trajectory of infectious diseases is important in planning an  
74 effective public health response. Reported case data depend heavily on testing modalities and  
75 practices which typically change over time, resulting in considerable uncertainty in the case  
76 ascertainment rate (CAR; the fraction of infections that are officially reported). During the  
77 COVID-19 pandemic, many countries relied primarily on symptom-based testing programmes  
78 to inform situational awareness and public health responses. In Aotearoa New Zealand, the CAR  
79 for COVID-19 has been influenced by factors such as access to testing, a shift from healthcare  
80 worker-administered polymerase chain reaction (PCR) tests to self-administered rapid antigen  
81 tests (RATs), reduction in rates of symptomatic and severe disease due to rising population  
82 immunity, relaxation of testing requirements and recommendations, and/or lack of perceived  
83 need to test or ‘pandemic fatigue’ [1, 2, 3]. As a result, over time, officially reported cases of  
84 COVID-19 have become a less reliable measure of levels of SARS-CoV-2 infection.

85 Data on hospital admissions and deaths are more consistent and are less affected by testing  
86 practices and behavioural change than reported cases but are subject to additional delays [4]  
87 that limit their usefulness for understanding disease dynamics. Infection prevalence surveys [5]  
88 that aim to regularly test a representative sample of the population are the gold-standard for  
89 tracking the spread of an infectious disease, but these surveys are resource intensive, making  
90 them harder to justify as countries move out of the acute phase of the pandemic. For example,  
91 regular SARS-CoV-2 infection prevalence surveys in the UK [6] have now been wound down  
92 and there are no current plans for similar surveys in New Zealand.

93 Wastewater surveillance, where levels of SARS-CoV-2 RNA in wastewater samples are mea-  
94 sured, can provide additional data on the prevalence of the virus that are unaffected by individ-  
95 ual testing and self-reporting behaviours. Wastewater surveillance (also known as wastewater-  
96 based epidemiology or WBE) also has the potential to contribute to an integrated global network  
97 for disease surveillance [7, 8, 9]. These data, however, can be highly variable and subject to other  
98 biases, such as rainwater dilution, sampling methodologies, and changing locations of selected  
99 sampling sites. To realise this potential, appropriate models and analytical tools are needed  
100 to deliver epidemiological insights from raw data. Previous work by [10] and [11] estimated  $R_t$   
101 from wastewater data, compared the results with estimates derived from case data, and found  
102 that WBE can provide independent and reliable estimates of  $R_t$ .

103 Semi-mechanistic models based on the renewal equation are a popular method for epidemic  
104 forecasting and estimation of the instantaneous reproduction number [12, 13, 14]. Such methods  
105 are robust to constant under-ascertainment of cases, but may be biased by rapid changes in

106 CAR and cannot provide any information about the total number of infections. In this paper,  
107 we extend the renewal equation framework [12, 13, 14] for reproduction number estimation  
108 to incorporate wastewater time-series data. The model treats the instantaneous reproduction  
109 number and CAR as hidden states and reported cases and quantity of viral RNA in wastewater  
110 as observed states. We use a sequential Monte Carlo approach to infer the hidden states. We  
111 apply the model to national data from Aotearoa New Zealand on reported COVID-19 cases and  
112 the average number of SARS-CoV-2 genome copies per person per day measured in municipal  
113 wastewater samples between January 2022 and March 2023. Because the relationship between  
114 infections and wastewater concentration is only determined in the model up to an overall scaling  
115 constant, it cannot be used to infer the absolute CAR but can be used to estimate relative  
116 changes in case ascertainment over time.

117 From March 2020 until December 2021 New Zealand used strict border controls and intermittent  
118 non-pharmaceutical interventions to suppress and eliminate transmission of SARS-CoV-2. By  
119 the beginning of 2022, there had been a cumulative total of around 3 confirmed cases of COVID-  
120 19 per 1,000 people and around 90% of the population over 12 years old had received at least  
121 two doses of the Pfizer-BioNTech vaccine. From October 2021, interventions were progressively  
122 eased and in January 2022 the B.1.1.529 (Omicron) variant began to spread in the community,  
123 causing the first large wave of infection. Since then community transmission has been sustained,  
124 with multiple further waves of infection being driven by various Omicron subvariants. Between  
125 1 January 2022 and 31 March 2023, there was a cumulative total of around 440 confirmed cases  
126 per 1,000 people, most of which were from self-administered RATs. During this period, SARS-  
127 CoV-2 concentration was regularly measured at various wastewater treatment plants, providing  
128 an additional data source on changes in community prevalence over time.

## 129 **2 Materials and Methods**

### 130 **2.1 Data**

131 National daily reported cases of COVID-19 were obtained from the New Zealand Ministry of  
132 Health [15]. Until February 2022, these cases were diagnosed solely by healthcare-administered  
133 PCR testing. From February 2022, in response to the rapid increase in reported cases, RATs  
134 were widely distributed. Since then, the vast majority of reported cases have been from self-  
135 administered RATs, with results reported through an online portal. Reported cases are shown  
136 in Figure 1. As these data exhibit a clear day-of-the-week effect we remove the weekly trend  
137 before fitting the model (see Supplementary Material sec. 1.2 for details).

138 SARS-CoV-2 concentration data from wastewater samples collected by the Institute for Envi-  
139 ronmental Science and Research (ESR) were used for this study [16]. Wastewater samples were  
140 collected every week at municipal wastewater treatment plants located throughout the coun-  
141 try, serving communities with populations ranging from 400 to over 500,000 people. Typically  
142 70-90% of the national population connected to reticulated wastewater was covered by waste  
143 water sampling in any given week (60-124 sites, usually sampled twice per week). We aggregate  
144 the individual wastewater samples into daily estimates of genome copies per person by taking  
145 volume-weighted averages of the samples on each day and dividing by the total population  
146 connected to the sampled sites (see Figure 1).

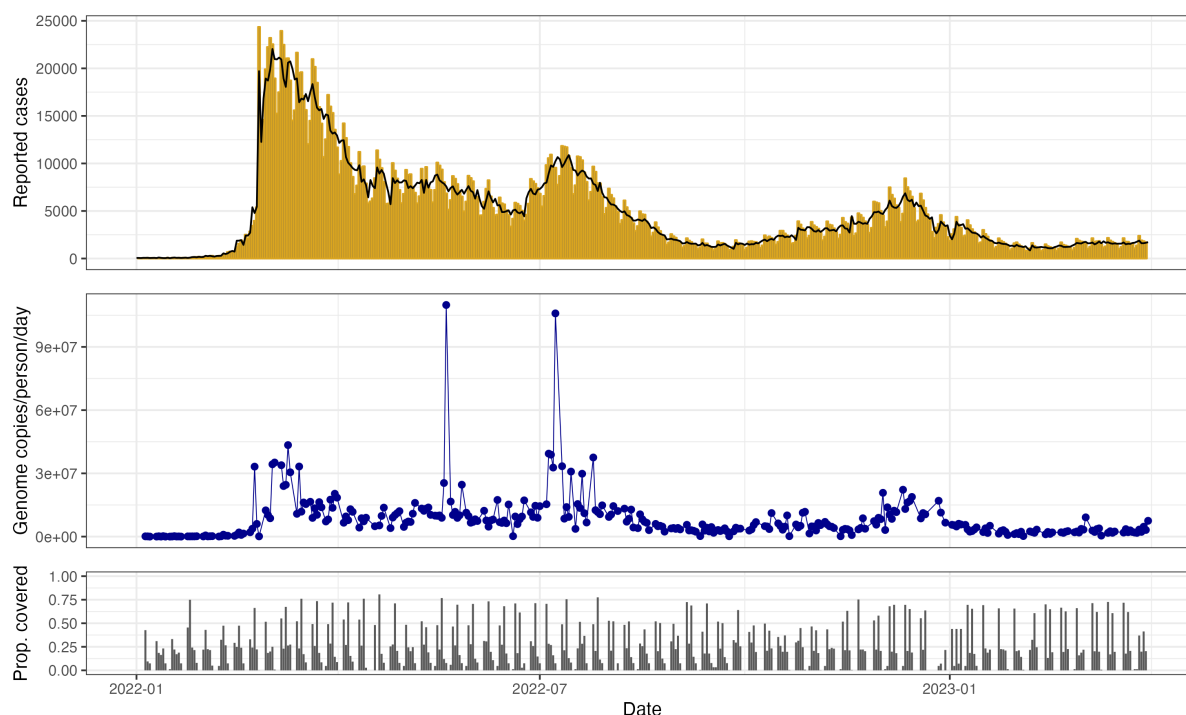

Figure 1: Reported cases of COVID-19 (upper), daily SARS-CoV-2 genome copies per litre in sampled wastewater (middle), and proportion of the total population covered by sampled wastewater catchments (lower), between 1 January 2022 and 31 March 2023 in Aotearoa New Zealand. The black line in the upper plot shows the adjusted case series with the multiplicative day-of-the-week effect removed (see Supplementary Material section 1.2). The two outliers in wastewater data arise from estimates of a high wastewater flow-rate in Wellington following high rainfall. Since rainfall is a source of noise in wastewater sampling we retain these samples in our analysis. Reported case data were obtained from the New Zealand Ministry of Health [15] and wastewater data were obtained from ESR [16].

## 147 2.2 Hidden state model

148 We construct a state-space model (Figure 2) consisting of time-varying hidden states (the in-  
149 stantaneous reproduction number  $R_t$ , daily case ascertainment rate  $CAR_t$ , and daily infection  
150 incidence  $I_t$ ) and time-varying observed states (daily reported cases of COVID-19  $C_t$  and daily  
151 wastewater observations  $W_t$ ). We use subscript  $s : t$  to refer to all values between day  $s$  and  $t$   
152 inclusive.

153 We assume the hidden states  $R_t$  and  $CAR_t$  follow independent Gaussian random walks, encoding  
154 the fact we expect them to vary continuously over time. We also assume that the hidden state  
155  $I_t$  follows a Poisson renewal process, a simple epidemic model commonly used when estimating  
156  $R_t$  [12]. Thus our state-space transitions are governed by:

$$\begin{aligned} (R_t|R_{t-1}) &\sim N_{(0,\infty)}(R_{t-1}, \sigma_R R_{t-1}) \\ (CAR_t|CAR_{t-1}) &\sim N_{(0,1)}(CAR_{t-1}, \sigma_{CAR}) \\ (I_t|R_t, I_{1:t-1}) &\sim Poisson\left(R_t \sum_{u=1}^{t-1} g_u I_{t-u}\right) \end{aligned}$$

157 Parameters  $\sigma_R$  and  $\sigma_{CAR}$  determine how quickly  $R_t$  and  $CAR_t$  vary. The standard deviation  
158 of the transition distribution for  $R_t \rightarrow R_{t+1}$  is given by  $\sigma_R R_t$ , which means that  $R_t$  varies more  
159 rapidly at larger values. The distribution for  $R_t$  was truncated on  $(0, \infty)$  and for  $CAR_t$  on  
160  $(0, 1)$ . Finally,  $g_u$  is the pre-determined generation time distribution, describing the proportion  
161 of transmission events that occur  $u$  days after infection (see Supplementary Material sec. 2.7).

162 We assume that the expected number of reported cases  $\mu_t^c$  at time  $t$  is equal to  $CAR_t$  multiplied  
163 by the convolution of past infections with the infection-to-reporting distribution  $L_u$ :

$$\mu_t^c = CAR_t \sum_{u=1}^t I_{t-u} L_u$$

164 Similarly, we assume that the expected number of genome copies per person  $\mu_t^w$  at time  $t$  is equal  
165 to the convolution of past infections with the infection-to-shedding distribution  $\omega_u$ , multiplied  
166 by a fixed parameter  $\alpha$ , representing the average total genome copies produced by an infectious  
167 individual:

$$\mu_t^w = \alpha \sum_{u=1}^t I_{t-u} \omega_u$$

168 We model reported cases using a negative binomial distribution:

$$(C_t|CAR_t, I_{1:t}) \sim NegBin\left(r = k_c, p = \frac{k_c}{k_c + \mu_t^c}\right)$$

169 which has mean  $\mu_t^c$  and variance  $\mu_t^c \left(1 + \frac{\mu_t^c}{k_c}\right)$ . A negative binomial distribution is used to  
 170 account for noise in the observations beyond that predicted by a binomial distribution. This is  
 171 a common choice in other methods of reproduction number estimation [14, 17].

172 We model observed wastewater data using a shape-scale gamma distribution:

$$(W_t | I_{1:t}) \sim \Gamma \left( k_w \text{pop}_t, \frac{\mu_t^w}{k_w \text{pop}_t} \right)$$

173 which has mean  $\mu_t^w$  and variance  $\frac{(\mu_t^w)^2}{k_w \text{pop}_t}$ . The variable  $\text{pop}_t$  refers to the daily population in  
 174 the catchment areas of the sampled wastewater sites at time  $t$ . Scaling by this allows the model  
 175 to account for additional noise when fewer or smaller sites were sampled. On days when no  
 176 sites were sampled, we let  $P(W_t = 0) = 1$ , meaning that the model filters on case data alone.  
 177 The gamma distribution is a reasonably flexible choice for a non-negative continuous random  
 178 variable, however other distributions could be considered, such as a Weibull or log-normal.

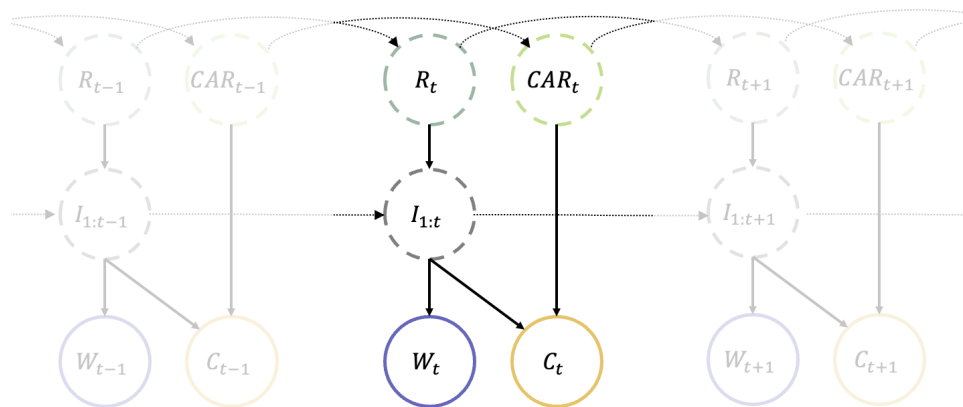

Figure 2: Diagram of the state-space model showing the dependency between hidden-states (dashed circles) and the observed data (solid circles).  $R_t$  is the instantaneous reproduction number on day  $t$ ,  $CAR_t$  is the case ascertainment rate on day  $t$ ,  $I_t$  is the number of new infections on day  $t$ ,  $C_t$  is the number of reported cases on day  $t$ , and  $W_t$  is the observed wastewater, measured as genome copies per person per day, on day  $t$ .  $I_{1:t}$  denotes the set of states  $\{I_1, I_2, \dots, I_t\}$ . In practice the current infections  $I_t$ , reported cases  $C_t$  and wastewater  $W_t$  depend only on recent values of  $I_t$  as specified by the generation interval distribution, the infection-to-reporting distribution, and infection-to-shedding distribution respectively (see Methods).

179 In the absence of additional information we are unable to estimate  $\alpha$ , which represents the  
 180 average total genome copies shed by an infected individual over the course of their infection.



Table 1: Parameter values used in the model. The infection-to-reporting and infection-to-shedding distributions are calculated as convolutions of the incubation period distribution [18] and the onset-to-reporting and onset-to-shedding distribution [19] respectively (see Supplementary Material sec. 2.7).

| Parameter                                     | Symbol         | Value                                                 |
|-----------------------------------------------|----------------|-------------------------------------------------------|
| Coefficient of variation of $R_t$ transitions | $\sigma_R$     | Fitted                                                |
| Std dev. of $CAR_t$ transitions               | $\sigma_{CAR}$ | Fitted                                                |
| Reported cases tuning parameter               | $k_c$          | Fitted                                                |
| Wastewater tuning parameter                   | $k_w$          | Fitted                                                |
| Generation time distribution [20, 21]         | $g_u$          | Mean = 3.3 days, s.d. = 1.3 days                      |
| Infection-to-reporting distribution           | $L_u$          | Mean = 5.8 days, s.d. = 2.6 days                      |
| Infection-to-shedding distribution            | $\omega_u$     | Mean = 5.2 days, s.d. = 2.9 days                      |
| Average total genome copies per infection     | $\alpha$       | $3 \times 10^9$ ( $2 \times 10^9$ , $4 \times 10^9$ ) |
| Fixed-lag resampling window                   | $h$            | 30 days                                               |

181 This means we are unable to estimate the absolute value of  $CAR_t$ . Instead, we run the model  
 182 with a range of different values for  $\alpha$ , and estimate the change in  $CAR_t$  relative to its initial  
 183 value. This additionally requires the assumption that  $\alpha$  is constant over time, which is unlikely  
 184 to be true in general and is a key limitation of our model (see Discussion).

185 The infection-to-reporting and infection-to-shedding distributions are calculated as the convo-  
 186 lution of the incubation period distribution with the onset-to-reporting and onset-to-shedding  
 187 distribution respectively. The incubation period is modelled as a Weibull distribution with mean  
 188 2.9 days and standard deviation 2.0 days [18]. The onset-to-reporting distribution is estimated  
 189 empirically from New Zealand case data extracted on 16 September 2022, representing over 1.2  
 190 million cases, and has mean 1.8 days and standard deviation 1.8 days. The onset-to-shedding  
 191 distribution comes from [19] and has mean 0.7 days and standard deviation 2.6 days. The  
 192 resulting infection-to-reporting distribution has mean 5.8 days and standard deviation 2.6, and  
 193 the resulting infection-to-shedding distribution has mean 5.2 days and standard deviation 2.9  
 194 days (see Supplementary Figure S1).

195 The model is solved using a bootstrap filter [22] with fixed-lag resampling. This produces  
 196 estimates for the marginal posterior distribution of the hidden states at each time step. The  
 197 random walk step variance parameters ( $\sigma_R$  and  $\sigma_{CAR}$ ) and observation variance parameters  
 198 ( $k_c$  and  $k_w$ ) are estimated using a particle marginal Metropolis Hastings Markov chain Monte  
 199 Carlo method. We use uninformative uniform prior distributions for these parameters, with  
 200 the exception of  $\sigma_{CAR}$ , where we use an informative prior distribution to ensure an appropriate  
 201 level of smoothness in our estimates of  $CAR_t$ . Different parameter values are fitted in three-

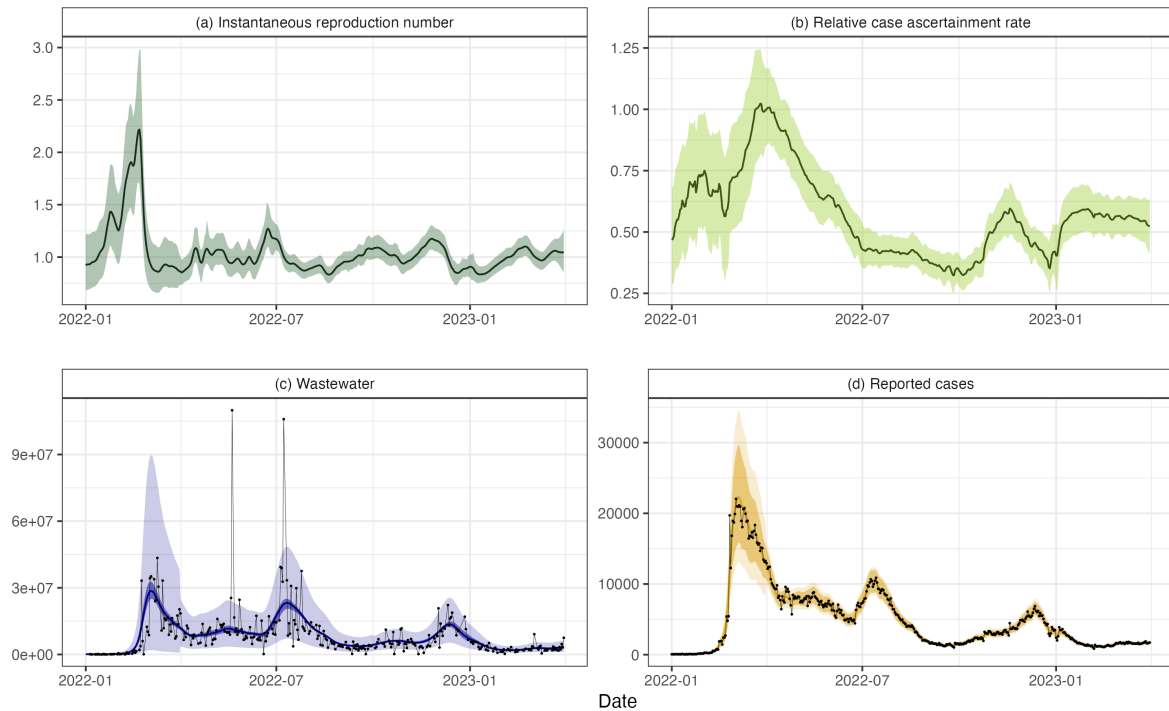

Figure 3: Results for New Zealand data from 1 January 2022 to 31 March 2023. (a) instantaneous reproduction number  $R_t$ , (b) relative case ascertainment rate  $CAR_t$  (compared to the central estimate on 1 April 2022), (c) wastewater data  $W_t$  measured in genome copies per person per day and (d) reported cases  $C_t$ . Results assume the average total shedding per infection does not vary over time ( $\alpha = 3 \times 10^9$ ). Solid lines present central estimates. Shaded regions show 95% credible intervals on the value of the hidden states (subplots a and b), and 95% credible intervals on the expected reported cases and wastewater data (darker shaded regions in subplots c and d) and 95% credible intervals on the prediction distribution for wastewater data and reported cases (lighter shaded regions in subplots c and d). Black dots show the observed data.

202 month blocks to allow for some variation over time. See Supplementary Material sec. 2 for  
203 further details of the numerical method. Code and data to reproduce the results are provided  
204 at <https://github.com/nicsteyn2/NZWastewaterModelling>.

## 205 3 Results

### 206 Reproduction number, relative case ascertainment, and infection incidence

207 The estimated value of the reproduction number  $R_t$  (Figure 3a) increased from around 1 at the  
208 beginning of 2022 to a peak of 2.46 (95% CrI 2.04, 3.20) on 18 February 2022 (95% CrI 10 Feb,  
209 23 Feb), corresponding to the sharp increase in cases seen during the first Omicron wave, which  
210 was a mixture of the BA.1 and BA.2 variants [23]. The estimated value of  $R_t$  dropped below 1  
211 on 1 March 2022 (95% CrI 25 Feb, 5 Mar) and infection incidence peaked on 28 February 2022  
212 (95% CrI 23 Feb, 7 Mar), suggesting this is when the wave peaked.

213 The estimated CAR (Figure 3b) increased rapidly between mid-February and mid-March 2022.  
214 RATs became widely available for the first time in the last week of February 2022. This likely  
215 led to a significant increase in case ascertainment as the testing system, which had previously  
216 relied solely on laboratory-processed PCR tests, had become overwhelmed [3]. The estimated  
217 CAR approximately halved between April and July 2022, when a second wave of infection  
218 caused by the BA.5 Omicron subvariant [23, 24] occurred. This second wave was visible in both  
219 reported cases and wastewater sampling, with estimated peak infections occurring on 7 July  
220 2022 (95% CrI 3 Jul, 12 Jul). The estimated CAR increased somewhat between mid 2022 and  
221 early 2023, with a noticeable dip in December 2022, possibly reflecting reduced testing during  
222 the Christmas and summer school holiday period (from mid-December to late-January/early-  
223 February). Alternatively, the estimated increase in CAR from mid-2022 could be explained by  
224 a decrease in the average genome copies shed by an infected individual  $\alpha$ , although without  
225 further information we are unable to discern changes in  $\alpha$ . Overall, the model provided a  
226 reasonably good fit to the observed data on cases and wastewater (Figure 3c-d).

227 Figure 4a-b shows the estimated daily incidence and cumulative infections for three values of  
228  $\alpha$ , corresponding to estimated CAR values on 1 April 2022 of 0.42 (95% CrI 0.35, 0.50), 0.61  
229 (95% CrI 0.51, 0.71), and 0.80 (95% CrI 0.67, 0.93), for  $\alpha = 2 \times 10^9$ ,  $3 \times 10^9$ , and  $4 \times 10^9$   
230 respectively. For comparison, the graphs also show the number of cases per capita in a cohort of  
231 approximately 20,000 border workers who were tested weekly between January and July 2022  
232 [24], scaled according to population size. This cohort is not representative of the population  
233 and may not have perfect case ascertainment, so we do not expect the results to match exactly.  
234 However, they provide a limited validation that the model is producing plausible estimates for  
235 total infections.

236 Whilst peak reported cases (adjusted for the day-of-the-week effect) in the second wave were  
237 only 49% of the peak in the first wave (10,879 vs 22,038 respectively), under the assumption

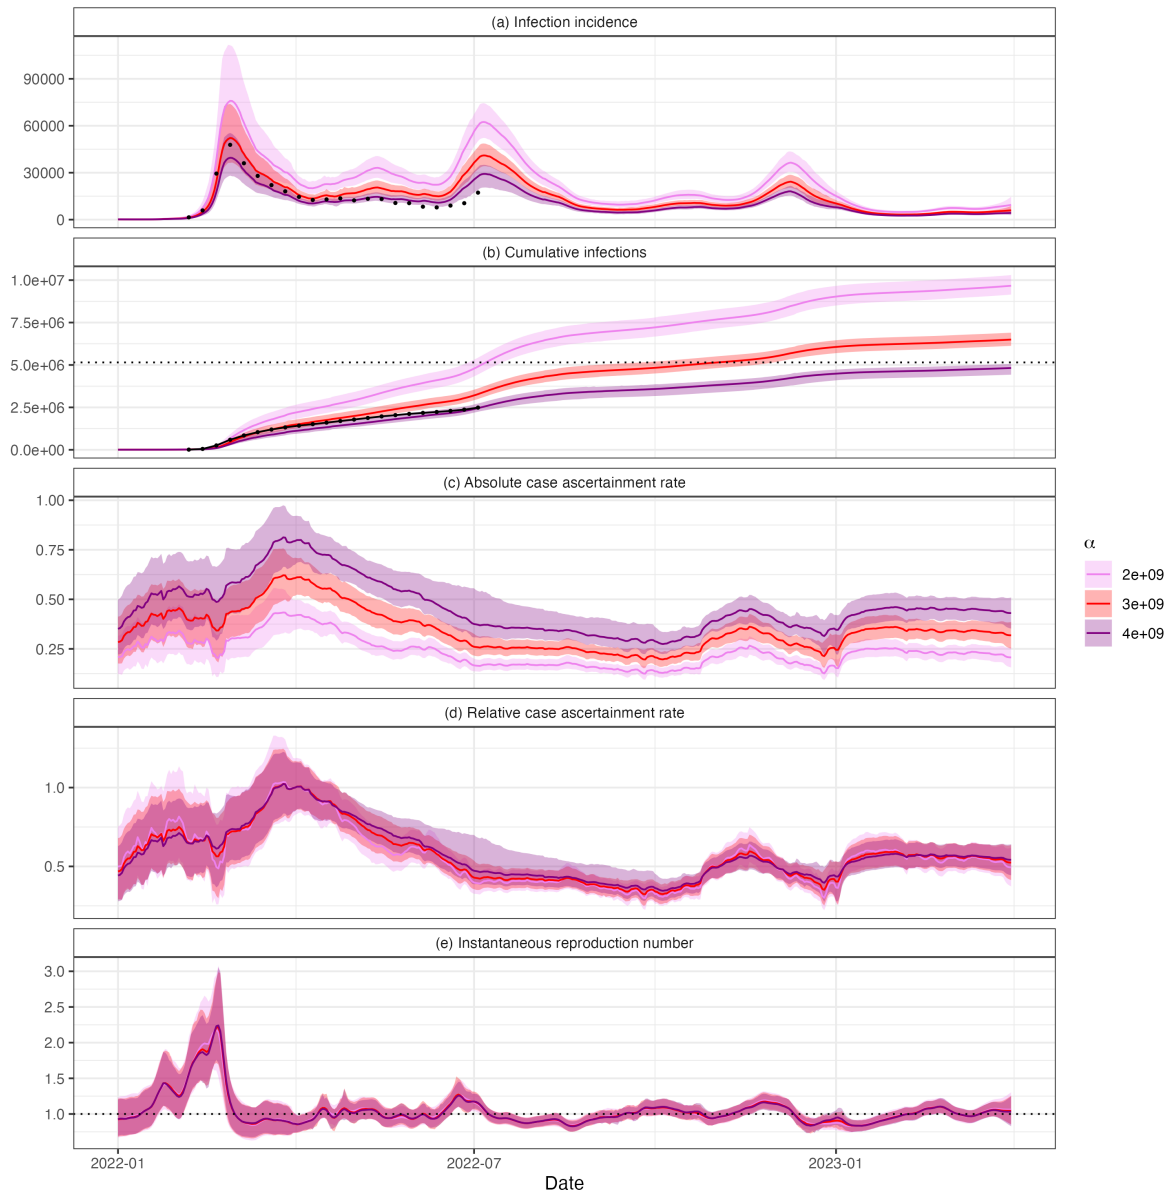

Figure 4: Estimated (a) daily infections  $I_t$ , (b) cumulative infections  $\sum_{s=0}^t I_s$ , (c) case ascertainment rate  $CAR_t$ , (d) relative case ascertainment rate (compared to the central estimate on 1 April 2022), and (e) instantaneous reproduction number,  $R_t$ . Results are presented for three values of  $\alpha$ :  $2 \times 10^9$ ,  $3 \times 10^9$ , and  $4 \times 10^9$ . Solid lines show central estimates and coloured regions are the 95% CrIs. Estimates and credible intervals on cumulative infections are calculated by taking cumulative sums of the estimates and credible intervals in panel (a). Black dots in panels (a) and (b) show the number of per capita cases in a cohort of regularly-tested border workers, scaled according to population size. The horizontal dashed black line in panel (b) shows the New Zealand population at the end of 2022 (5.15 million people) [25]. While changing  $\alpha$  results in different estimates of infections and absolute CAR, the relative CAR and reproduction number estimates are robust to different values, provided  $\alpha$  remains relatively constant.

Table 2: Central estimates and 95% CrIs for estimated model parameters in each time period. Dates in the ‘Period’ column are the start date for the three-month period. All outputs presented to 2 s.f. Higher values of  $\sigma_R$  and  $\sigma_{CAR}$  suggest  $R_t$  and  $CAR_t$  vary faster. Higher values of  $k_c$  and  $k_w$  indicate a lower variance in the corresponding observation distribution. Note a different prior distribution was used for  $\sigma_{CAR}$  in the first period (see Supplementary Material, sec. 2.4), which may also impact estimates of other parameters in this period.

| Period starting | $\sigma_R$           | $\sigma_{CAR}$         | $k_c$          | $k_w (\times 10^{-6})$ |
|-----------------|----------------------|------------------------|----------------|------------------------|
| 1 Jan 2022      | 0.12 (0.069, 0.21)   | 0.03 (0.017, 0.043)    | 31 (20, 49)    | 1.5 (1.1, 2)           |
| 1 Apr 2022      | 0.069 (0.041, 0.12)  | 0.0099 (0.0053, 0.014) | 170 (100, 250) | 4.8 (3.2, 6.8)         |
| 1 Jul 2022      | 0.037 (0.02, 0.066)  | 0.0063 (0.0018, 0.01)  | 330 (220, 400) | 4.8 (3.3, 6.5)         |
| 1 Oct 2022      | 0.038 (0.02, 0.068)  | 0.011 (0.0073, 0.014)  | 170 (110, 270) | 7.2 (4.7, 10)          |
| 1 Jan 2023      | 0.038 (0.018, 0.073) | 0.0093 (0.0041, 0.015) | 150 (84, 330)  | 6.8 (4.4, 10)          |

238 of constant  $\alpha$ , the central estimate from the model suggests that true infections peaked at  
 239 approximately 78% of the peak of the initial wave (Figure 4a). Figure 4c-e shows the estimated  
 240 absolute and relative CAR and  $R$ . These panels show that, while we are uncertain about the  
 241 absolute level of infections and CAR, the relative CAR and reproduction number estimates are  
 242 robust to reasonable choices for (constant)  $\alpha$ .

## 243 Parameter estimates

244 The estimated standard deviation  $\sigma_R$  of the random walk on  $R_t$  was greatest in the first time  
 245 period (1 Jan – 31 Mar 2022) – see Table 2. This is unsurprising as it coincided with the rapid  
 246 increase and then decrease in incidence associated with the first Omicron wave.  $\sigma_R$  decreased  
 247 in the second period (1 Apr – 30 Jun 2022) and then remained relatively constant throughout  
 248 the remaining periods (1 Jul 2022 – 31 Mar 2023). The estimated standard deviation  $\sigma_{CAR}$  of  
 249 the random walk on  $CAR_t$  was also estimated to be greatest in the first time period, although  
 250 this is primarily because we applied a prior distribution with a higher mean in this period (see  
 251 Supplementary Material sec. 2.4).

252 The estimated variance parameters,  $k_c$  and  $k_w$ , for cases and wastewater observations, were  
 253 lowest in the first time period (1 Jan 2022 – 31 Mar 2022). This implies there is more variability  
 254 in the data that is not explained by the model in this time period, possibly as a consequence of  
 255 the sharper variations in incidence compared to the later time periods. A less consistent weekly  
 256 pattern in reported cases during the first time period, and higher levels of noise in wastewater  
 257 observations at the low concentrations seen at the beginning of 2022, could also be contributing  
 258 factors.

## 259 4 Discussion

260 WBE has been used globally for COVID-19 surveillance and has been shown to be a useful  
261 public health tool for policy and public health responses [26]. We have presented a semi-  
262 mechanistic model that combines reported cases with wastewater data to estimate the time-  
263 varying reproduction number and CAR. This work demonstrates the value of WBE and how  
264 the additional data that it provides can be combined with traditional monitoring (e.g., reported  
265 cases) to learn more about the state of an epidemic, disease dynamics, and the true number  
266 of infections in the community. This provides useful information to inform the public health  
267 response.

268 To make reliable estimates of the state of the epidemic from reported cases, it is essential to  
269 understand how case ascertainment changes with time. For example, are there fewer cases  
270 because there are fewer infections or because fewer people are reporting? We applied our model  
271 to national data from Aotearoa New Zealand and derived important insights into changes in  
272 case ascertainment over the 15-month period considered. Reported cases during the second  
273 wave in July 2022 were significantly lower than in the first wave in February and March 2022.  
274 However, the model inferred that there was a substantial drop in case ascertainment between  
275 these waves, and the true number of infections was likely more similar in each wave. The  
276 reduced CAR during the second and subsequent waves may have been due to a higher number  
277 of reinfections with individuals displaying fewer symptoms or due to “pandemic fatigue” and  
278 reduced compliance with public health measures, including testing. This type of insight would  
279 not be possible without regular wastewater surveillance data and without a robust analytical  
280 framework in which to integrate these data with traditional epidemiological data streams.

281 Strengths of our model include the fact that it has relatively minimal data requirements, re-  
282 quiring only time series for reported cases and wastewater concentrations. This means that it  
283 could be readily applied in other jurisdictions with wastewater surveillance programs, either  
284 for SARS-CoV-2 or other pathogens such as influenza viruses [26, 27]. It is a relatively simple  
285 model with minimal mechanistic assumptions and parsimonious parameterisation. This means  
286 that results are less sensitive to model misspecification or parameter uncertainty than more  
287 complex mechanistic models. The model presented here was operationalised by ESR in late  
288 2022 and results for  $R_t$  and relative CAR are regularly provided to the Ministry of Health to  
289 inform situational awareness and decision-making.

290 There are several limitations to this model and the results. We assume that the average number  
291 of genome copies shed by an infected individual (the  $\alpha$  parameter) was constant through 2022  
292 and 2023 and did not depend on the infecting variant or history of prior infection or vaccination.

293 It is possible that some of the inferred changes in CAR may be partly explained by these  
294 factors. For example, some of the inferred increase in case ascertainment between October and  
295 December 2022 may have been due to decreasing  $\alpha$ , caused by a combination of new immune  
296 evasive subvariants displacing the previously dominant BA.5 variant [28] and/or an increase in  
297 the proportion of reinfections or asymptomatic infections [15]. Furthermore, as we are unable to  
298 estimate the true value of  $\alpha$ , we are unable to estimate the absolute CAR. Nonetheless, relative  
299 CAR is a useful metric and, given an estimated range of values for  $\alpha$ , we are able to provide  
300 plausible bounds on the total number of infections (Figure 4).

301 Wastewater surveillance does not provide any information on how infections are distributed  
302 among population groups (e.g. age groups, ethnicity) and biases in self-administered testing  
303 mean that case counts are not representative either. This information is important for assessing  
304 the clinical burden of disease and addressing health inequities [29]. Thus, other approaches are  
305 needed to determine the distribution of disease burden, such as representative sampling [6, 30],  
306 cohort studies [31] or sentinel surveillance [32].

307 As our model is flexible, future work could integrate hospitalisations (such as in [33]) and deaths  
308 data. In principle, this could allow the effects of varying CAR and varying rate of shedding per  
309 infection to be separated. However, this would additionally require the effects of age, immunity,  
310 ethnicity, and other variables on clinical severity to be accounted for.

311 The model could also be implemented at a regional level so that local epidemic dynamics can  
312 be compared. This paper has focused on modelling for inference: understanding epidemic  
313 dynamics that have already occurred. However, the state-space transition model coupled with  
314 the estimated parameters provides a natural method for forecasting [34, 14]. Forecasts generated  
315 using this state-space transition model naturally incorporate increasing uncertainty about the  
316 future reproduction number and CAR.

317 While this model has focused on COVID-19, there is a wealth of genetic information within  
318 municipal wastewater that could also benefit from modelling. The detection and concentration  
319 of viral, bacterial and anti-microbial resistance genes within wastewater have the ability to  
320 inform public health decision-making in a number of ways, especially as methodology is refined  
321 allowing more rapid turn-around times. As many jurisdictions seek to retain the wastewater  
322 capabilities they built during the pandemic phase of COVID-19 (and to diversify microbial  
323 targets), there is an 'opportunity springboard' to build tools that can predict the trajectories  
324 and spread of pathogens - modelling has a key role to play in this journey.

## 325 Data availability

326 Daily reported case data for Aotearoa New Zealand are available from the Ministry of Health at  
327 <https://github.com/minhealthnz/nz-covid-data> and seven-day average wastewater data  
328 are available from ESR at [https://github.com/ESR-NZ/covid\\_in\\_wastewater](https://github.com/ESR-NZ/covid_in_wastewater).

329 Code to run the model and reproduce the results in this paper are available at <https://github.com/nicsteyn2/NZWastewaterModelling>.

## 331 Acknowledgements

332 The authors acknowledge the role of the New Zealand Ministry of Health in supplying data  
333 in support of this work. The authors thank the many city and district council staff members  
334 who collected the wastewater samples and the ESR laboratory staff who processed and tested  
335 the samples used in this study. This work was funded by the New Zealand Ministry of Health  
336 and the Department of Prime Minister and Cabinet (DPMC). This work was supported by  
337 the NIHR HPRU in Emerging and Zoonotic Infections, a partnership between PHE, University  
338 of Oxford, University of Liverpool, and Liverpool School of Tropical Medicine (grant number  
339 NIHR200907 supporting C.A.D.). L. M. W. was supported by a Rutherford Foundation Post-  
340 doctoral Fellowship from New Zealand government funding, administered by the Royal Society  
341 Te Apārangi. N.S. acknowledges support from the Oxford-Radcliffe Scholarship from University  
342 College, Oxford, and the Engineering and Physical Sciences Research Council (EPSRC) Centre  
343 for Doctoral Training (CDT) in Modern Statistics and Statistical Machine Learning (Imperial  
344 College London and University of Oxford). We thank A. Maslov for supporting this research  
345 through studentship support for N.S.

## 346 References

- 347 [1] Ewan Colman, Gavril A. Puspitarani, Jessica Enright, and Rowland R. Kao. Ascertain-  
348 ment rate of SARS-CoV-2 infections from healthcare and community testing in the UK.  
349 *Journal of Theoretical Biology*, 558, 2 2023.
- 350 [2] Oliver Eales, David Haw, Haowei Wang, Christina Atchison, Deborah Ashby, Graham S.  
351 Cooke, Wendy Barclay, Helen Ward, Ara Darzi, Christl A. Donnelly, Marc Chadeau-Hyam,  
352 Paul Elliott, and Steven Riley. Dynamics of SARS-CoV-2 infection hospitalisation and  
353 infection fatality ratios over 23 months in England. *PLOS Biology*, 21(5):e3002118, 5 2023.



- 354 [3] Giorgia Vattiatio, Audrey Lustig, Oliver J. Maclaren, and Michael J. Plank. Modelling the  
355 dynamics of infection, waning of immunity and re-infection with the Omicron variant of  
356 SARS-CoV-2 in Aotearoa New Zealand. *Epidemics*, 41:100657, 12 2022.
- 357 [4] Kris V. Parag, Christl A. Donnelly, and Alexander E. Zarebski. Quantifying the information  
358 in noisy epidemic curves. *Nature Computational Science*, 2(9):584–594, 9 2022.
- 359 [5] Fatimah S. Dawood, Christina A. Porucznik, Vic Veguilla, Joseph B. Stanford, Jazmin  
360 Duque, Melissa A. Rolfes, Ashton Dixon, Priyam Thind, Emily Hacker, Maria Julia E.  
361 Castro, Zuha Jeddy, Michael Daugherty, Kim Altunkaynak, Danielle Rentz Hunt, Utsav  
362 Kattel, Jennifer Meece, and Melissa S. Stockwell. Incidence Rates, Household Infection  
363 Risk, and Clinical Characteristics of SARS-CoV-2 Infection Among Children and Adults  
364 in Utah and New York City, New York. *JAMA Pediatrics*, 176(1):59–67, 1 2022.
- 365 [6] Koen B. Pouwels, Thomas House, Emma Pritchard, Julie V. Robotham, Paul J. Birrell,  
366 Andrew Gelman, Karina Doris Vihta, Nikola Bowers, Ian Boreham, Heledd Thomas, James  
367 Lewis, Iain Bell, John I. Bell, John N. Newton, Jeremy Farrar, Ian Diamond, Pete Ben-  
368 ton, Ann Sarah Walker, Koen B. Pouwels, A. Sarah Walker, Derrick Crook, Philippa C.  
369 Matthews, Tim Peto, Nicole Stoesser, Alison Howarth, George Doherty, James Kavanagh,  
370 Kevin K. Chau, Stephanie B. Hatch, Daniel Ebner, Lucas Martins Ferreira, Thomas Chris-  
371 tott, Brian D. Marsden, Wanwisa Dejnirattisai, Juthathip Mongkolsapaya, Sarah Hoos-  
372 dally, Richard Cornall, David I. Stuart, Gavin Screaton, David Eyre, John Bell, Stuart  
373 Cox, Kevin Paddon, Tim James, John N. Newton, Julie V. Robotham, Paul Birrell, Helena  
374 Jordan, Tim Sheppard, Graham Athey, Dan Moody, Leigh Curry, Pamela Brereton, Jodie  
375 Hay, Harper Vansteenhuse, Alex Lambert, Emma Rourke, Stacey Hawkes, Sarah Henry,  
376 James Scruton, Peter Stokes, Tina Thomas, John Allen, Russell Black, Heather Bovill,  
377 David Brauholtz, Dominic Brown, Sarah Collyer, Megan Crees, Colin Daghish, Byron  
378 Davies, Hannah Donnarumma, Julia Douglas-Mann, Antonio Felton, Hannah Finselbach,  
379 Eleanor Fordham, Alberta Ipser, Joe Jenkins, Joel Jones, Katherine Kent, Geeta Kerai,  
380 Lina Lloyd, Victoria Masding, Ellie Osborn, Alpi Patel, Elizabeth Pereira, Tristan Pett,  
381 Melissa Randall, Donna Reeve, Palvi Shah, Ruth Snook, Ruth Studley, Esther Sutherland,  
382 Eliza Swinn, Anna Tudor, Joshua Weston, Shayla Leib, James Tierney, Gabor Farkas, Raf  
383 Cobb, Folkert Van Galen, Lewis Compton, James Irving, John Clarke, Rachel Mullis, Lor-  
384 raine Ireland, Diana Airimitoiaie, Charlotte Nash, Danielle Cox, Sarah Fisher, Zoe Moore,  
385 James McLean, and Matt Kerby. Community prevalence of SARS-CoV-2 in England from  
386 April to November, 2020: results from the ONS Coronavirus Infection Survey. *The Lancet*  
387 *Public Health*, 6(1):e30–e38, 1 2021.
- 388 [7] Christian G. Daughton. Wastewater surveillance for population-wide Covid-19: The  
389 present and future, 9 2020.

- 390 [8] Harsh Dutta, Geetanjali Kaushik, and Venkatesh Dutta. Wastewater-based epidemiol-  
391 ogy: a new frontier for tracking environmental persistence and community transmission of  
392 COVID-19. *Environmental Science and Pollution Research*, 29(57):85688–85699, 12 2022.
- 393 [9] Aparna Keshaviah, Megan B Diamond, Matthew J Wade, Samuel V Scarpino, Warish  
394 Ahmed, Fabian Amman, Olusola Aruna, Andrei Badilla-Aguilar, Itay Bar-Or, Andreas  
395 Bergthaler, Julie E Bines, Aaron W Bivins, Alexandria B Boehm, Jean-Martin Brault,  
396 Jean-Baptiste Burnet, Joanne R Chapman, Angela Chaudhuri, Ana Maria de Roda Hus-  
397 man, Robert Delatolla, John J Dennehy, Megan Beth Diamond, Celeste Donato, Erwin  
398 Duizer, Abiodun Egwuenu, Oran Erster, Despo Fatta-Kassinos, Aldo Gaggero, Deirdre F  
399 Gilpin, Brent J Gilpin, Tyson E Graber, Christopher A Green, Amanda Handley, Joanne  
400 Hewitt, Rochelle H Holm, Heribert Insam, Marc C Johnson, Rabia Johnson, Davey L  
401 Jones, Timothy R Julian, Asha Jyothi, Aparna Keshaviah, Tamar Kohn, Katrin G Kuhn,  
402 Giuseppina La Rosa, Marie Lesenfants, Douglas G Manuel, Patrick M D’Aoust, Rudolf  
403 Markt, John W McGrath, Gertjan Medema, Christine L Moe, Indah Kartika Murni, Hu-  
404 mood Naser, Colleen C Naughton, Leslie Ogorzaly, Vicka Oktaria, Christoph Ort, Popi  
405 Karaolia, Ekta H Patel, Steve Paterson, Mahbubur Rahman, Pablo Rivera-Navarro, Alex  
406 Robinson, Monica C Santa-Maria, Samuel V Scarpino, Heike Schmitt, Theodore Smith,  
407 Lauren B Stadler, Jorgen Stassijns, Alberta Stenico, Renee A Street, Elisabetta Suffredini,  
408 Zachary Susswein, Monica Trujillo, Matthew J Wade, Marlene K Wolfe, Habib Yakubu,  
409 and Maria Ines Zanoli Sato. Wastewater monitoring can anchor global disease surveillance  
410 systems. *The Lancet Global Health*, 11(6):e976–e981, 6 2023.
- 411 [10] Jana S. Huisman, Jérémie Scire, Lea Caduff, Xavier Fernandez-Cassi, Pravin Ganesanan-  
412 damoorthy, Anina Kull, Andreas Scheidegger, Elyse Stachler, Alexandria B. Boehm, Brid-  
413 gette Hughes, Alisha Knudson, Aaron Topol, Krista R. Wigginton, Marlene K. Wolfe,  
414 Tamar Kohn, Christoph Ort, Tanja Stadler, and Timothy R. Julian. Wastewater-Based  
415 Estimation of the Effective Reproductive Number of SARS-CoV-2. *Environmental Health*  
416 *Perspectives*, 130(5), 5 2022.
- 417 [11] Guangming Jiang, Jiangping Wu, Jennifer Weidhaas, Xuan Li, Yan Chen, Jochen Mueller,  
418 Jiaying Li, Manish Kumar, Xu Zhou, Sudipti Arora, Eiji Haramoto, Samendra Sherchan,  
419 Gorka Orive, Unax Lertxundi, Ryo Honda, Masaaki Kitajima, and Greg Jackson. Artificial  
420 neural network-based estimation of COVID-19 case numbers and effective reproduction rate  
421 using wastewater-based epidemiology. *Water Research*, 218, 6 2022.
- 422 [12] Anne Cori, Neil M. Ferguson, Christophe Fraser, and Simon Cauchemez. A new framework  
423 and software to estimate time-varying reproduction numbers during epidemics. *American*  
424 *journal of epidemiology*, 178(9):1505–1512, 11 2013.
- 425 [13] R. N. Thompson, J. E. Stockwin, R. D. van Gaalen, J. A. Polonsky, Z. N. Kamvar, P. A.

- 426 Demarsh, E. Dahlgvist, S. Li, E. Miguel, T. Jombart, J. Lessler, S. Cauchemez, and  
427 A. Cori. Improved inference of time-varying reproduction numbers during infectious disease  
428 outbreaks. *Epidemics*, 29:100356, 12 2019.
- 429 [14] Sam Abbott, Joel Hellewell, Robin N. Thompson, Katharine Sherratt, Hamish P. Gibbs,  
430 Nikos I. Bosse, James D. Munday, Sophie Meakin, Emma L. Doughty, June Young Chun,  
431 Yung-Wai Desmond Chan, Flavio Finger, Paul Campbell, Akira Endo, Carl A. B. Pearson,  
432 Amy Gimma, Tim Russell, Stefan Flasche, Adam J. Kucharski, Rosalind M. Eggo, and  
433 Sebastian Funk. Estimating the time-varying reproduction number of SARS-CoV-2 using  
434 national and subnational case counts. *Wellcome Open Research*, 5:112, 12 2020.
- 435 [15] Ministry of Health. COVID-19 data for New Zealand, 2023.
- 436 [16] ESR. COVID-19 Data Repository by the Institute of Environmental Science and Research,  
437 2023.
- 438 [17] Nick Golding, David J. Price, Gerard E. Ryan, Jodie McVernon, James M. McCaw, and  
439 Freya M. Shearer. A modelling approach to estimate the transmissibility of SARS-CoV 2  
440 during periods of high, low, and zero case incidence. *eLife*, 12, 1 2023.
- 441 [18] Jantien A. Backer, Dirk Eggink, Stijn P. Andeweg, Irene K. Veldhuijzen, Noortje van  
442 Maarseveen, Klaas Vermaas, Boris Vlaemynck, Raf Schepers, Susan van den Hof, Chan-  
443 tal B.E.M. Reusken, and Jacco Wallinga. Shorter serial intervals in SARS-CoV-2 cases with  
444 Omicron BA.1 variant compared with Delta variant, the Netherlands, 13 to 26 December  
445 2021. *Euro Surveillance*, 27(6), 2 2022.
- 446 [19] Joanne Hewitt, Sam Trowsdale, Bridget A. Armstrong, Joanne R. Chapman, Kirsten M.  
447 Carter, Dawn M. Croucher, Cassandra R. Trent, Rosemary E. Sim, and Brent J. Gilpin.  
448 Sensitivity of wastewater-based epidemiology for detection of SARS-CoV-2 RNA in a low  
449 prevalence setting. *Water Research*, 211:118032, 3 2022.
- 450 [20] Sam Abbott, Katharine Sherratt, Moritz Gerstung, and Sebastian Funk. Estimation of  
451 the test to test distribution as a proxy for generation interval distribution for the Omicron  
452 variant in England. *medRxiv*, 1 2022.
- 453 [21] Dasom Kim, Sheikh Taslim Ali, Sungchan Kim, Jisoo Jo, Jun Sik Lim, Sunmi Lee, and  
454 Sukhyun Ryu. Estimation of Serial Interval and Reproduction Number to Quantify the  
455 Transmissibility of SARS-CoV-2 Omicron Variant in South Korea. *Viruses 2022, Vol. 14,*  
456 *Page 533*, 14(3):533, 3 2022.
- 457 [22] N. J. Gordon, D. J. Salmond, and A. F.M. Smith. Novel approach to nonlinear/non-  
458 gaussian Bayesian state estimation. *IEE Proceedings, Part F: Radar and Signal Processing*,  
459 140(2):107–113, 1993.

- 460 [23] Jordan Douglas, David Winter, Andrea McNeill, Sam Carr, Michael Bunce, Nigel French,  
461 James Hadfield, Joep de Ligt, David Welch, and Jemma L. Geoghegan. Tracing the inter-  
462 national arrivals of SARS-CoV-2 Omicron variants after Aotearoa New Zealand reopened  
463 its border. *Nature Communications*, 13(1), 12 2022.
- 464 [24] Audrey Lustig, Giorgia Vattiato, Oliver Maclaren, Leighton M. Watson, Samik Datta, and  
465 Michael J. Plank. Modelling the impact of the Omicron BA.5 subvariant in New Zealand.  
466 *Journal of the Royal Society Interface*, 20(199), 2 2023.
- 467 [25] Stats NZ. National population estimates: at 31 December 2022, 2023.
- 468 [26] Pruthvi Kilaru, Dustin Hill, Kathryn Anderson, Mary B. Collins, Hyatt Green, Brittany L.  
469 Kmush, and David A. Larsen. Wastewater Surveillance for Infectious Disease: A Systematic  
470 Review. *American journal of epidemiology*, 192(2):305–322, 2 2023.
- 471 [27] Daniel Toribio-Avedillo, Clara Gómez-Gómez, Laura Sala-Comorera, Lorena Rodríguez-  
472 Rubio, Albert Carcereny, David García-Pedemonte, Rosa Maria Pintó, Susana Guix, Belén  
473 Galofré, Albert Bosch, Susana Merino, and Maite Muniesa. Monitoring influenza and res-  
474 piratory syncytial virus in wastewater. Beyond COVID-19. *Science of The Total Environ-*  
475 *ment*, page 164495, 5 2023.
- 476 [28] Sarah M. Prasek, Ian L. Pepper, Gabriel K. Innes, Stephanie Slinski, Walter Q. Betan-  
477 court, Aidan R. Foster, Hayley D. Yaglom, W. Tanner Porter, David M. Engelthaler, and  
478 Bradley W. Schmitz. Variant-specific sars-cov-2 shedding rates in wastewater. *Science of*  
479 *the Total Environment*, 857, 1 2023.
- 480 [29] Nicholas Steyn, Rachelle N Binny, Kate Hannah, Shaun C Hendy, Alex James, Audrey  
481 Lustig, Kannan Ridings, Michael J Plank, and Andrew Sporle. Māori and Pacific people  
482 in New Zealand have a higher risk of hospitalisation for COVID-19. 134:1538, 2021.
- 483 [30] Steven Riley, Kylie E.C. Ainslie, Oliver Eales, Caroline E. Walters, Haowei Wang, Christina  
484 Atchison, Claudio Fronterre, Peter J. Diggle, Deborah Ashby, Christl A. Donnelly, Graham  
485 Cooke, Wendy Barclay, Helen Ward, Ara Darzi, and Paul Elliott. Resurgence of SARS-  
486 CoV-2: Detection by community viral surveillance. *Science*, 372(6545):990–995, 5 2021.
- 487 [31] Q. Sue Huang, Tim Wood, Lauren Jelley, Tineke Jennings, Sarah Jefferies, Karen Daniells,  
488 Annette Nesdale, Tony Dowell, Nikki Turner, Priscilla Campbell-Stokes, Michelle Balm,  
489 Hazel C. Dobinson, Cameron C. Grant, Shelley James, Nayyereh Aminisani, Jacqui Ral-  
490 ston, Wendy Gunn, Judy Bocacao, Jessica Danielewicz, Tessa Moncrieff, Andrea McNeill,  
491 Liza Lopez, Ben Waite, Tomasz Kiedrzyński, Hannah Schrader, Rebekah Gray, Kayla  
492 Cook, Danielle Currin, Chaune Engelbrecht, Whitney Tapurau, Leigh Emmerton, Max-  
493 ine Martin, Michael G. Baker, Susan Taylor, Adrian Trenholme, Conroy Wong, Shirley

- 494 Lawrence, Colin McArthur, Alicia Stanley, Sally Roberts, Fahimeh Rahnama, Jenny Ben-  
495 nett, Chris Mansell, Meik Dilcher, Anja Werno, Jennifer Grant, Antje van der Linden, Ben  
496 Youngblood, Paul G. Thomas, and Richard J. Webby. Impact of the COVID-19 nonphar-  
497 maceutical interventions on influenza and other respiratory viral infections in New Zealand.  
498 *Nature Communications*, 12(1), 12 2021.
- 499 [32] M. C. Zambon, J. D. Stockton, J. P. Clewley, and D. M. Fleming. Contribution of in-  
500 fluenza and respiratory syncytial virus to community cases of influenza-like illness: An  
501 observational study. *Lancet*, 358(9291):1410–1416, 10 2001.
- 502 [33] Hannes Schenk, Petra Heidinger, Heribert Insam, Norbert Kreuzinger, Rudolf Markt, Fabi-  
503 ana Nägele, Herbert Oberacher, Christoph Scheffknecht, Martin Steinlechner, Gunther  
504 Vogl, Andreas Otto Wagner, and Wolfgang Rauch. Prediction of hospitalisations based  
505 on wastewater-based SARS-CoV-2 epidemiology. *Science of the Total Environment*, 873, 5  
506 2023.
- 507 [34] R. Moss, A. Zarebski, P. Dawson, and J. M. McCaw. Retrospective forecasting of the  
508 2010-2014 Melbourne influenza seasons using multiple surveillance systems. *Epidemiology  
509 and Infection*, 145(1):156–169, 1 2017.
