# Supplementary material for: Improving estimates of epidemiological quantities by combining reported cases with wastewater data: a statistical framework with applications to COVID-19 in Aotearoa New Zealand
Source: bioRxiv or medRxiv preprint supplement (doi:10.1101/2023.08.14.23294060), 2024-04-03
Supplement: Supplementary file [file media-1.pdf]

|    |          |                                                                              |           |
|----|----------|------------------------------------------------------------------------------|-----------|
| 22 | 2.2.3    | Wind-In Period . . . . .                                                     | 6         |
| 23 | 2.3      | Likelihood Estimation . . . . .                                              | 7         |
| 24 | 2.4      | Particle Marginal Metropolis-Hastings . . . . .                              | 8         |
| 25 | 2.5      | Prior Distributions and Proposal Variances . . . . .                         | 8         |
| 26 | 2.6      | Practical Considerations for Particle Marginal Metropolis-Hastings . . . . . | 10        |
| 27 | 2.7      | Posterior Distribution on Hidden States . . . . .                            | 11        |
| 28 | 2.8      | Pre-Determined Parameters . . . . .                                          | 12        |
| 29 | 2.9      | Estimating Curvewise Extrema . . . . .                                       | 13        |
| 30 | <b>3</b> | <b>Supplementary Results</b>                                                 | <b>13</b> |
| 31 | 3.1      | Synthetic Verification of Hidden State Estimates . . . . .                   | 13        |
| 32 | 3.2      | Visualising Log-Likelihood Estimates . . . . .                               | 15        |
| 33 | 3.3      | Sensitivity to Delay Distributions . . . . .                                 | 15        |
| 34 | <b>4</b> | <b>Particle Marginal Metropolis-Hastings Outputs</b>                         | <b>19</b> |
| 35 | 4.1      | Period 1: 1 January 2022 – 31 March 2022 . . . . .                           | 20        |
| 36 | 4.2      | Period 2: 1 April 2022 – 30 June 2022 . . . . .                              | 21        |
| 37 | 4.3      | Period 3: 1 July 2022 – 30 September 2022 . . . . .                          | 22        |
| 38 | 4.4      | Period 4: 1 October 2022 – 31 December 2022 . . . . .                        | 23        |

# 39 1 Data

## 40 1.1 Wastewater Sampling

41 Composite samples were collected by an autosampler, which collects a small volume of waste  
42 water at regular intervals over the course of a 24-hour period. When composite samples were not  
43 available, ‘grab’ samples were collected and ranged from a sample being taken at a single point  
44 in time to three samples taken over 30 minutes. Grab samples represent only the composition  
45 of the source at the time of collection and may not be as representative as a 24-hour composite  
46 sample collected by an autosampler. Following collection, samples were couriered overnight to  
47 the Institute of Environmental Science and Research (ESR) for processing.

48 Virus concentration was performed by SARS-CoV-2 detection and quantitation by RT-qPCR of  
49 the N-gene as described in [1]. Wastewater (250 mL) was concentrated to 1.25 mL, of which 0.2  
50 mL was used for nucleic extraction. Six RT-qPCR replicates were performed for each sample.  
51 SARS-CoV-2 RNA was considered detected if any of the RT-qPCR replicates were positive. A  
52 result of ‘not detected’ meant that SARS-CoV-2 RNA was either absent from the sample or at  
53 a level too low to be reliably reported.

54 RT-qPCR data (quantification cycle values) were converted to genome copies per reaction using  
55 a standard curve and then to genome copies per litre of wastewater. Each sample is multiplied  
56 by the estimated volume of wastewater entering the wastewater treatment plant to estimate  
57 the total genome copies per day. These are summed over all sites sampled on that day and  
58 divided by the total volume of wastewater entering all sampled wastewater treatment plants to  
59 give daily estimates of genome copies per litre of wastewater. We also calculate the daily total  
60 population across sampled catchment sites.

61 The data and comprehensive details about collection and processing are available at [https://github.com/ESR-NZ/covid\\_in\\_wastewater](https://github.com/ESR-NZ/covid_in_wastewater) [2].

## 63 1.2 Reported Cases

64 National daily reported cases of COVID-19 were obtained from the New Zealand Ministry of  
65 Health and are available at <https://github.com/minhealthnz/nz-covid-data> [3]. Reported  
66 case data exhibit a clear day-of-the-week effect, which we remove in pre-processing using a  
67 simple linear regression model. The log-transformed daily case count was regressed against the  
68 day of the week and the data were then divided by the exponential of the regression coefficient  
69 for each day of the week. Adjusted daily case counts were then scaled so the total case count

70 remains consistent. We perform this day-of-the-week adjustment in the following consecutive  
71 time windows: before 1 January 2022, 1 January to 28 February 2022, 1 March to 30 June  
72 2022, 1 July to 30 September 2022, 1 October to 31 December 2022, and 1 January 2023 to 31  
73 March 2023. These are mostly three months in duration, except that the boundary between  
74 the second and third windows was selected to coincide with the change from PCR-only testing  
75 to widespread availability and use of RATs [4], as this impacted the weekly reporting pattern.

76 Algorithmically, this seasonal adjustment is performed when the data are loaded. As it results  
77 in non-integer daily case counts, we round the outputs to the nearest integer. The functions  
78 to do this are included in the “loadNZData.jl” function at [https://github.com/nicsteyn2/](https://github.com/nicsteyn2/NZWastewaterModelling/tree/main/src)  
79 [NZWastewaterModelling/tree/main/src](https://github.com/nicsteyn2/NZWastewaterModelling/tree/main/src).

## 80 2 Model Derivation and Algorithms

### 81 2.1 Fixed-Lag Bootstrap Filter

82 We have hidden states  $CAR_t, R_t, I_t$ , observed data  $W_t, C_t$ , and fixed parameter vector  $\theta$ . We are  
83 interested in learning the joint posterior distribution  $P(CAR_{1:T}, R_{1:T}, I_{1:T}, \theta | W_{1:T}, C_{1:T})$ . The  
84 goal of algorithm 1 (below) is to construct a set of particles  $\left\{ \left( CAR_k^{(i)}, R_k^{(i)}, I_k^{(i)} \right) : i = 1, \dots, N \right\}$   
85 that approximate this distribution.

86 For simplicity, let our hidden states be collectively denoted  $X_t = (CAR_t, R_t, I_t)$  and our observed  
87 data  $y_t = (W_t, C_t)$ . We start with the filtering distribution at time  $t$  which we denote  $q_t$  (defined  
88 below). We decompose this filtering distribution into the following recursion:

$$\begin{aligned} q_t &= P_\theta(X_{1:t} | y_{1:t}) \\ &\propto P_\theta(y_t | X_{1:t}, y_{1:t-1}) P_\theta(X_{1:t} | y_{1:t-1}) \\ &= P_\theta(y_t | X_{1:t}) P_\theta(X_t | X_{1:t-1}, y_{1:t-1}) P_\theta(X_{1:t-1} | y_{1:t-1}) \\ &= P_\theta(y_t | X_{1:t}) P_\theta(X_t | X_{1:t-1}) q_{t-1} \end{aligned}$$

89 where  $P_\theta(y_t | X_{1:t}) = P_\theta(W_t | I_{1:t-1}) P_\theta(C_t | CAR_t, I_{1:t-1})$  is our joint observation distribution and  
90  $P_\theta(X_t | X_{1:t-1}) = P_\theta(CAR_t | CAR_{t-1}) P_\theta(R_t | R_{t-1}) P_\theta(I_t | I_{1:t-1})$  is our joint state-space transition  
91 distribution.

92 The decomposition makes two assumptions: (1)  $y_t$  is conditionally independent of  $y_{1:t-1}$  given  
93  $X_t$ , and (2)  $X_t$  is conditionally independent of  $y_{1:t-1}$  given  $X_{1:t-1}$ . The definition of the obser-  
94 vation and state-space transition distributions require further assumptions that are clear from  
95 their definition.

96 We define our importance sampling distribution  $\pi$  in a similar recursive fashion:

$$\pi(X_{1:t}|y_{1:t}) = \pi(X_t|X_{1:t-1}, y_{1:t})\pi(X_{1:t-1}|y_{1:t-1})$$

97 requiring the non-restrictive assumption that our importance distribution on  $X_{1:t-1}$  does not  
 98 depend on  $y_t$ . This further allows us to define the importance sampling weights recursively:

$$\begin{aligned} w_k^{(i)} &\propto \frac{P_\theta(y_t|X_{1:t}^{(i)})P_\theta(X_t^{(i)}|X_{1:t-1}^{(i)})q_{t-1}^{(i)}}{\pi(X_t^{(i)}|X_{1:t-1}^{(i)}, y_{1:t})\pi(X_{1:t-1}^{(i)}|y_{1:t-1})} \\ &= \frac{P_\theta(y_t|X_{1:t}^{(i)})P_\theta(X_t^{(i)}|X_{1:t-1}^{(i)})}{\pi(X_t^{(i)}|X_{1:t-1}^{(i)}, y_{1:t})}w_{k-1}^{(i)} \end{aligned}$$

99 Finally, we choose our importance sampling distribution  $\pi(X_t^{(i)}|X_{1:t-1}^{(i)}, y_{1:t})$  to be the state-  
 100 space transition distribution  $P_\theta(X_t^{(i)}|X_{1:t-1}^{(i)})$ , allowing these terms to be cancelled, and giving  
 101 the recursion for the particle weights:

$$w_k^{(i)} = P_\theta(y_t|X_{1:t}^{(i)})w_{k-1}^{(i)}$$

102 At each time step, we re-sample with replacement from our current particles according to  $w_{k-1}^{(i)}$ ,  
 103 thus the selected particles at time step  $t$  can be viewed as direct draws from  $P_\theta(X_t|y_{1:t})$ .

104 Additionally re-sampling the  $h$  most recent time steps re-weights past particles according to  
 105  $P_\theta(y_t|X_{1:t}^{(i)})$ , thus they can be viewed as samples from  $P_\theta(X_t|y_{1:t+L})$ . We note that in doing  
 106 this resampling, we break the particle ancestry, so only have samples from the marginal distri-  
 107 butions  $P_\theta(X_t|y_{1:t+L}) \approx P_\theta(X_t|y_{1:T})$  and not the full joint distribution over state-trajectories  
 108  $P_\theta(X_{1:t}|y_{1:t+L})$  (except for the final  $L$  states).

109 Conditional on a fixed value of  $\theta$ , algorithm 1 presents our fixed-lag bootstrap filter. This  
 110 assumes a default wind-in period equal to  $h$  (30-days), although this can be changed as necessary.

## 111 2.2 Practical Considerations for the Bootstrap Filter

### 112 2.2.1 Choosing the Fixed-Lag $h$

113 In an ideal world we would resample the entire state-history at every step, producing direct  
 114 samples from our desired posterior distribution  $P(X_t|y_{1:T})$ . In fact, this also admits samples  
 115 from the joint posterior distribution across all time steps  $P(X_{1:T}|y_{1:T})$ , which would allow us  
 116 to sample individual trajectories. However, as  $T$  increases, the number of individual unique  
 117 particles that remain in the earlier time steps (most obviously at  $t = 1$ ) gets increasingly small.  
 118 Eventually only a handful, or even a single, unique particle will remain for  $X_1$ , which provides  
 119 a very poor approximation of  $P(X_1|y_{1:T})$ . This can be somewhat overcome by increasing the

120 number of particles  $N_x$ , but given present computing power this quickly becomes impractical.  
 121 Instead we re-sample only the most recent  $h$  time steps, which means our particles at time step  
 122  $t$  are samples from  $P(X_t|y_{1:t+h})$  whenever  $t+h < T$ . The value of  $h$  needs to be large enough  
 123 that  $P(X_t|y_{1:t+h}) \approx P(X_t|y_{1:T})$  while being small enough that we avoid particle degeneracy for  
 124 reasonable values of  $N_x$ .

### 125 2.2.2 Calculating Cumulative Infections

126 In figure 4 of the main text we present estimates of cumulative infections  $CI_t$ . If we were  
 127 resampling entire particle histories at each time step (rather than fixed-lag resampling) we would  
 128 be able to set  $CI = \sum_{u=1}^t I_u^{(i)}$  for our  $i^{\text{th}}$  sample of cumulative infections at time  $t$ . However, our  
 129 fixed-lag resampling breaks the state-histories, so this approach is invalid. Instead, we augment  
 130 cumulative infections as an additional hidden state, at each time step setting:

$$CI_t^{(i)} = CI_{t-1}^{(i)} + I_t^{(i)}$$

131 and resampling as usual. As the particle filter produces samples from  $P(CI_t|y_{1:t+h})$ , this method  
 132 produces valid estimates of the pointwise cumulative infections  $CI_t$ .

---

#### Algorithm 1 Fixed-lag bootstrap filter

---

Input: Parameter vector  $\theta$ , data  $W_{1:T}$  and  $C_{1:T}$

Sample  $CAR_{-h:0}^{(i)}$ ,  $R_{-h:0}^{(i)}$ , and  $I_{-h:0}^{(i)}$  from some initial state distribution

**for**  $t = 1, \dots, T$  **do**

Sample  $CAR_t^{(i)} \sim P_\theta(CAR_t|CAR_{t-1}^{(i)})$

Sample  $R_t^{(i)} \sim P_\theta(R_t|R_{t-1}^{(i)})$

Sample  $I_t^{(i)} \sim P_\theta(I_t|R_t^{(i)}, I_{t-L:t}^{(i)})$

Set  $w_t^{(i)} = P_\theta(W_t|I_{t-L:t}^{(i)}, CAR_t^{(i)})P_\theta(C_t|CAR_t^{(i)}, I_{t-L:t}^{(i)})$

Sample with replacement indices  $\{x_j\}_{j=1}^N$  from  $i = 1, 2, \dots, N$  with probability  $w_t^{(i)}$

Update  $(CAR_{t-L:t}^{(j)}, R_{t-L:t}^{(j)}, I_{t-L:t}^{(j)}) \leftarrow (CAR_{t-L:t}^{(x_j)}, R_{t-L:t}^{(x_j)}, I_{t-L:t}^{(x_j)})$

**end for**

Return  $(CAR_{1:T}^{(i)}, R_{1:T}^{(i)}, I_{1:T}^{(i)})$

---

### 133 2.2.3 Wind-In Period

134 In practice we wind-in using two steps: (1) hidden states are randomly allocated values for  
 135  $t = -h$  to  $t = 0$ , and (2) the filter is run for  $t = 1$  to  $t = k$  for some  $k$ . We present results  
 136 and calculate likelihoods for  $t \geq k + 1$ . The first step is necessary for there to be sufficient

137 state-history to calculate the expected values of  $I_t$ ,  $C_t$ , and  $W_t$ , which all involve convolutions  
 138 of past infections. However, only a few of these randomly allocated trajectories will be plausible,  
 139 leading to considerable uncertainty in the initial estimates of our hidden states. Thus we use  
 140 data to filter particles as described above in the period  $0 \leq t \leq k$  and start the estimation  
 141 window at  $t = k$ , so that all particle chains have plausible past trajectories at this time. In  
 142 general  $k$  should be chosen to be greater than  $h$ .

143 This second wind-in period means that the estimation window only begins  $k$  days after the  
 144 start of the period for which data are available. It is possible to run the algorithm without the  
 145 second wind-in period, which may be necessary when data are limited. However, this leads to  
 146 greater uncertainty about estimated states in the early part of the time period and introduces  
 147 substantial additional variation in the estimates of the model log-likelihood (section 2.3). In  
 148 practice, we used  $k = 50$ , except for model runs starting on 1 January 2022 where we use  $k = 31$   
 149 as the earliest available data were 1 December 2021.

## 150 2.3 Likelihood Estimation

151 Thus far we have focused on estimating the value of the hidden states given some known  
 152 parameter vector  $\theta$ . Our particle filtering algorithm also admits a tidy, albeit noisy, method for  
 153 estimating the likelihood function  $L(\theta|y_{1:T}) \propto P(y_{1:T}|\theta)$  [5]. First note that:

$$P(y_{1:T}|\theta) = \prod_{t=1}^T P_\theta(y_t|y_{1:t-1})$$

154 We can write each term in the product as:

$$P_\theta(y_t|y_{1:t-1}) = \int P_\theta(y_t|X_{t-L:t})P_\theta(X_{t-L:t}|y_{1:t-1}) dX_{t-L:t}$$

155 Note  $P_\theta(y_t|X_{t-L:t}^{(i)}) = w_t^{(i)}$ . Furthermore, our projected (but non-filtered) particles  $\{\tilde{X}_{t-L:t}^{(i)}\}_{i=1}^N$   
 156 at time  $t$  provide an approximation to  $P_\theta(X_{t-L:t}|y_{1:t-1})$ . Together this conveniently allows us  
 157 to approximate this integral using:

$$P_\theta(y_t|y_{1:t-1}) \approx \frac{1}{N} \sum_{i=1}^N w_t^{(i)}$$

158 Taking logarithms gives us our estimator of the log-likelihood:

$$\hat{\ell}(\theta|y_{1:T}) = \sum_{t=1}^T \log \left( \frac{1}{N} \sum_{i=1}^N w_t^{(i)} \right)$$

159 As each term inside the outer sum is an approximation, the noise of this estimator grows with  
 160 the length of data. In general this noise increases linearly with time, as does the time it takes  
 161 to run a single filter, thus the computational requirements approximately scale with  $O(T^2)$  [6].

162 **2.4 Particle Marginal Metropolis-Hastings**

163 Particle marginal Metropolis-Hastings (PMMH; algorithm 2) is an established algorithm de-  
 164 signed to estimate the joint posterior distribution  $P(X_{1:T}, \theta|y_{1:T})$  of the hidden states and fixed  
 165 parameter vector given our data, although in practice we use this method to estimate the  
 166 marginal posterior distribution  $P(\theta|y_{1:T})$ . The algorithm uses the following proposal density:

$$q((X'_{1:T}, \theta')|(X_{1:T}, \theta)) = q(\theta'|\theta)P_{\theta'}(X'_{1:T}|y_{1:T})$$

167 where  $X'_{1:T}$  are generated by running a particle filter at  $\theta'$ . This gives an acceptance probability  
 168 of:

$$a = \min \left( 1, \frac{\hat{P}(y_{1:T}|\theta')P(\theta')q(\theta|\theta')}{\hat{P}(y_{1:T}|\theta)P(\theta)q(\theta'|\theta)} \right)$$

169 where  $q(\theta'|\theta)$  is our proposal density on our parameters and  $\hat{P}(y_{1:T}|\theta)$  is an estimate of the  
 170 model evidence at parameter vector  $\theta'$  - this is the exponential of  $\hat{\ell}(\theta|y_{1:T})$  described in section  
 171 2.3. The validity of using an estimate of the likelihood rather than an exact calculation is  
 confirmed in [5], which is a key difference between PMMH and standard Metropolis-Hastings.

---

**Algorithm 2** Particle Marginal Metropolis-Hastings

---

**Require:** Prior distribution  $P(\theta)$  on  $\theta$ , proposal density  $q(\theta'|\theta)$ , and number of MCMC steps

$N$

Initialise  $\theta_0 \sim P(\theta)$  and run algorithm 1 to estimate  $\hat{P}_{\theta_0} = P(\theta_0|y_{1:T})$

**for**  $i = 1, \dots, N$  **do**

    Sample  $\theta' \sim q(\cdot|\theta_{i-1})$

    Run algorithm 1 to estimate  $\hat{P}_{\theta'} = P(\theta'|y_{1:T})$

    Calculate acceptance probability  $a_i = \min \left( 1, \frac{\hat{P}(y_{1:T}|\theta')P(\theta')q(\theta_{i-1}|\theta')}{\hat{P}(y_{1:T}|\theta_{i-1})P(\theta_{i-1})q(\theta'|\theta_{i-1})} \right)$

    Let  $\theta_i = \theta'$  with probability  $a_i$ , else let  $\theta_i = \theta_{i-1}$

**end for**

Return  $(CAR_{1:T}^{(i)}, R_{1:T}^{(i)}, I_{1:T}^{(i)})$

---

172

173 **2.5 Prior Distributions and Proposal Variances**

174 The parameters  $\sigma_R$ ,  $\sigma_{CAR}$ ,  $k_c$ , and  $k_w$  may change as the epidemiological landscape changes so  
 175 we fitted them in five distinct time periods: (1) 1 January 2022 – 31 March 2022, (2) 1 April  
 176 2022 – 30 June 2022, (3) 1 July 2022 – 30 September 2022, (4) 1 October 2022 – 31 December  
 177 2022, and (5) 1 January 2023 – 31 March 2023. Choosing the duration of these windows requires



178 balancing changing epidemiological dynamics (we expect these parameters to somewhat change  
 179 over time) with using more data to obtain more precise estimates.

180 We use wide independent uniform distributions for our prior distributions on  $\sigma_R$ ,  $k_c$ , and  $k_w$ . A  
 181 wide uniform prior distribution can also be placed on  $\sigma_{CAR}$ , however, this results in a relatively  
 182 high-valued posterior estimate for this parameter as the model can choose values of  $CAR_t$  that  
 183 closely fit the fluctuations in reported case data. We want our estimates of  $CAR_t$  to reflect an  
 184 underlying reporting rate, rather than the daily noise in reporting, so use a prior distribution  
 185 on  $\sigma_{CAR}$  to ensure this. For time periods encompassing 1 April 2022 – 31 March 2023 we use  
 186 a normal distribution with mean 0.006 and standard deviation 0.00204, truncated on  $(0, \infty)$ ,  
 187 which has a 95<sup>th</sup> quantile of 0.01. For the first time period, encompassing 1 January 2022 to 31  
 188 March 2022, we use a higher-mean normal distribution with mean 0.024 and standard deviation  
 189 0.00816, truncated on  $(0, \infty)$ , which has a 95<sup>th</sup> quantile of 0.04. The use of a higher-mean prior  
 190 distribution for  $\sigma_{CAR}$  in this first period allows the model to fit to the rapid change in  $CAR_t$   
 191 that is thought to have occurred when RATs were rolled out in February 2022 [4]. Table S1  
 192 reports our choices for prior distributions.

193 We use independent normal proposal densities for each parameter. The chosen standard devi-  
 194 ations of the proposal densities are given in table S2. We outline how we chose these in section  
 195 2.6.

Table S1: Prior distributions on parameters. All normal distributions (represented by  $N$ ) are truncated on  $(0, \infty)$ . The continuous uniform distribution is represented by  $U$ . The period starting 1 March 2022 continues until the end of considered period on 31 March 2023.

| Period starting | $\sigma_R$        | $\sigma_{CAR}$ | $k_c$     | $k_w$      |
|-----------------|-------------------|----------------|-----------|------------|
| 1 Jan 2022      | N(0.024, 0.00816) | U(0, 0.1)      | U(0, 400) | U(0, 0.02) |
| 1 Mar 2022      | N(0.006, 0.00204) | U(0, 0.1)      | U(0, 400) | U(0, 0.02) |

Table S2: The chosen standard deviation for each independent normal proposal distribution.

| Period starting | $\sigma_R$ | $\sigma_{CAR}$ | $k_c$ | $k_w(\times 10^{-7})$ |
|-----------------|------------|----------------|-------|-----------------------|
| 1 Jan 2022      | 0.024      | 0.004          | 4.3   | 1.4                   |
| 1 Apr 2022      | 0.018      | 0.0014         | 21    | 5.5                   |
| 1 Jul 2022      | 0.010      | 0.0015         | 30    | 6.6                   |
| 1 Oct 2022      | 0.0073     | 0.001          | 22    | 7.4                   |
| 1 Jan 2023      | 0.0089     | 0.0015         | 22    | 8.9                   |

## 196 2.6 Practical Considerations for Particle Marginal Metropolis-Hastings

197 In situations where the proposed particle is rejected, it is not necessary to re-estimate  $\hat{P}_{\theta_{i-1}}$ .  
198 One can typically let  $\hat{P}_{\theta_i} = \hat{P}_{\theta_{i-1}}$ . In some situations, particularly when the variance of the  
199 likelihood estimator is large, the Markov chain can get stuck on values of  $\theta'$  where the estimate  
200 of  $P_{\theta'}$  was unusually high, resulting in slower convergence. To avoid this we re-estimate  $P_{\theta_{i-1}}$  if  
201  $n$  consecutive proposals have been rejected. Choosing  $n$  requires balancing the computational  
202 cost of running additional particle filters with the cost of slower mixing chains. We use  $n = 5$   
203 in this work.

204 Theoretically, this algorithm works irrespective of the number of particles  $N_x$  used in each filter,  
205 however, this does have a significant impact on the performance of the algorithm. A general  
206 heuristic is that  $N_x$  should be chosen such that the standard deviation of  $\hat{\ell}(\theta|y_{1:T})$  is around  
207 1.2-1.3 [6]. This standard deviation is a function of  $\theta$  itself (generally speaking estimates of  $\ell$  at  
208 more likely values of  $\theta$  have lower standard deviations) so choosing the ideal  $N_x$  is not a simple  
209 task. We use  $N_x = 10^5$  particles per filter when fitting to three-month time periods.

210 PMMH is a computationally expensive algorithm. Our results rely on 8 PMMH chains for each  
211 of the five time periods considered. Whilst running this on high-performance computing services  
212 can allow us to utilise the 40 cores required to run each chain simultaneously, it can still take  
213 multiple days to generate sufficient samples. We find that, with  $N_x = 10^5$ , it takes us approxi-  
214 mately 20 hours to generate 2000 samples (although this can be faster if more modern central  
215 processing units are used). As seen in section 4, this can be enough to meet certain conver-  
216 gence criteria even if this is fewer samples than most MCMC algorithms target. Practically we  
217 expect this to make little difference to our posterior estimates of  $\theta$ , and even less of a difference  
218 to our posterior estimates of  $X_{1:T}$ . This final point can be seen by noting that the marginal  
219 posterior estimates of  $X_{1:T}$  are very similar to the posterior estimates of  $X_{1:T}$  conditional on  
220 any plausible value of  $\theta$  - the majority of the uncertainty comes from the relationship between  
221 the hidden states and the observed data, rather than the hyper-parameters that characterise  
222 this relationship.

223 Despite generally using wide uniform prior distributions, we want to ensure our chains start  
224 at plausible values of  $\theta$ , otherwise considerable computation time must be spent on a wind-  
225 in period. Therefore, we first computed approximate bivariate heatmaps of the estimated  
226 log-likelihood on a coarse parameter mesh (see Supplementary Material sec. 3.2). We then  
227 initialised chains in the part of parameter space with relatively high likelihood values. As well  
228 as reducing convergence times, this technique also provides some reassurance that the PMMH  
229 algorithm is not missing any hidden modes, and that the posterior distribution found is similar  
230 to empirical results.

231 We ran the PMMH algorithm twice for each three-month block. First we did a training run, with  
 232 seemingly plausible values for the parameter proposal variances, to provide a crude estimate of  
 233 the posterior variance. Then a second, final, run was performed using the heuristic proposal  
 234 variance of  $2.38\sigma_{posterior}/n_{dim}$ , where  $\sigma_{posterior}$  is the estimated posterior standard deviation of  
 235 the chosen parameter from the first run, and  $n_{dim} = 4$  is the dimensionality of the parameter  
 236 space. This heuristic could be replaced with adaptive MCMC methods - these are well known  
 237 but slightly more complicated to implement from scratch.

## 238 2.7 Posterior Distribution on Hidden States

239 One way of estimating the marginal posterior distribution  $P(X_{1:T}|y_{1:T})$  is to store one (or more)  
 240 trajectories from each PMMH step. The resulting set of particle trajectories are samples from  
 241 the pointwise marginal posterior distribution  $P(X_t|Y_{1:T})$ . However, as we fit the parameters  
 242 in three-month windows, the PMMH method only outputs trajectories in three-month blocks,  
 243 which cannot be easily joined together.

244 Instead we first run algorithm 2 to generate a set of fixed parameter values  $\{\theta_i\}_{i=1}^{N_c} \sim P(\theta|y_{1:T})$ .  
 245 We then sample from  $P(X_{1:T}|y_{1:T})$  by iteratively uniformly sampling  $\theta^*$  from  $\{\theta_i\}_{i=1}^{N_c}$ , running  
 246 algorithm 1 with  $N_x$  particles at  $\theta = \theta^*$ , and keeping  $N_s$  trajectories (where  $N_s \leq N_x$ ) from the  
 247 output. Repeating this  $N_c$  times (once for each parameter sample) gives a set of  $N_s N_c$  particle  
 248 trajectories that approximate the pointwise posterior distribution  $P(X_t|y_{1:t+h}) \approx P(X_t|y_{1:T})$ .  
 249 Note that each sample from  $\{\theta_i\}_{i=1}^{N_c}$  consists of five independent sets of values for the inferred  
 250 parameters ( $\sigma_{CAR}$ ,  $\sigma_R$ ,  $k_c$  and  $k_w$ ), one for each of the five three-month periods. When we run  
 251 algorithm (2) for the whole 15-month period, we assume that the values of these four parameters  
 252 change instantaneously from one three-month block to the next.

253 Typically we want to run this with sufficient unique draws from  $P(\theta|y_{1:T})$  (say  $N_c \geq 100$ )  
 254 to appropriately account for uncertainty in  $\theta$ . The number of samples retained from each  
 255 iteration should be chosen so our overall number of trajectories is sufficiently large - we choose  
 256  $N_c N_s = 2 \times 10^6$ . Finally, as we are less concerned by minor degeneracy in individual particle  
 257 filters, the number of particles used in each filter  $N_x$  can be smaller than if we were just running  
 258 the filter once. For our results,  $N_x = 10^5$  worked well, but this needs to be tailored to individual  
 259 purposes.

260 When presenting results we calculate the mean of the samples as the central estimate and use  
 261 the 2.5<sup>th</sup> and 97.5<sup>th</sup> quantiles to represent our 95% credible intervals (CrI).

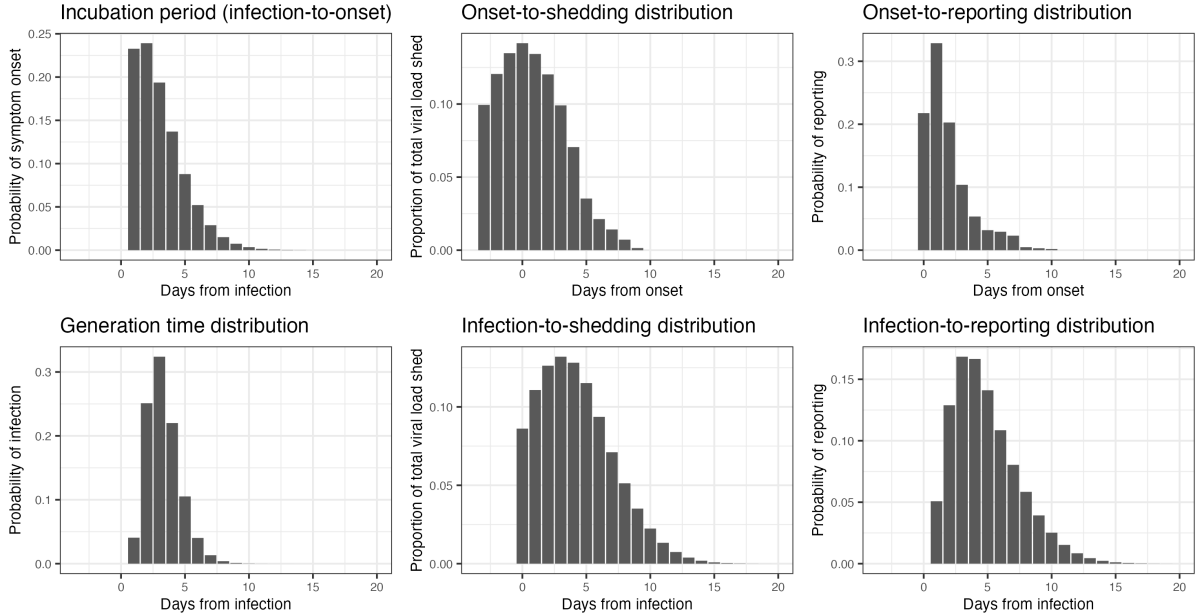

Figure S1: Delay distributions. Distributions reported in the first row were used as inputs to create the infection-to-shedding and infection-to-reporting distributions reported in the second row.

## 262 2.8 Pre-Determined Parameters

263 In addition to the estimated parameters, there are others that we fix. These are the generation  
 264 time distribution  $g_u$ , infection-to-reporting distribution  $L_u$ , the infection-to-shedding distribu-  
 265 tion  $\omega_u$ , and the average total genome copies per infection  $\alpha$ . We also pre-specify the fixed-lag  
 266 resampling window  $h = 30$ .

267 The generation time is assumed to be a discretised Gamma random variable with mean 3.3  
 268 days and standard deviation 1.3 days [7, 8, 9, 4]. The infection-to-reporting and infection-to-  
 269 shedding distributions are calculated as convolutions of an incubation period (infection-to-onset)  
 270 distribution (Weibull with mean 2.9 days and standard deviation 2.0 days [10]) and an onset-to-  
 271 reporting distribution (estimated from New Zealand data, mean 1.8 days and standard deviation  
 272 1.8 days) or an onset-to-shedding distribution (mean 0.7 and standard deviation 2.6 [1]). The  
 273 Gamma and Weibull distributions were discretised by taking their value at integer times and  
 274 normalising. All of these distributions are presented in Supplementary Figure S1.

## 275 2.9 Estimating Curvewise Extrema

276 Our primary methods produce pointwise estimates of the hidden states at each time step (e.g.  
277 mean and quantiles of the samples at each fixed value of  $t$ ). As the timing of peaks and troughs  
278 can be quite variable between particles, using pointwise statistics to quantify the heights and  
279 timings of peaks or troughs (e.g. local maxima in the median value across particles) can be  
280 misleading [11]. For this purpose, is important to consider these on a curvewise basis (e.g.  
281 median of the local maxima across particles). This requires samples from the joint posterior  
282 distribution  $P(X_{s:t}|y_{1:T})$  over some fixed window  $s : t$ .

283 We achieve this by increasing our resampling length  $h$  and halting the algorithm when the period  
284 of interest is contained in  $(T - h, T - 30)$  where  $T$  represents the final stopping time. Limiting  
285 the lower window to  $t \geq T - h$  ensures that complete trajectories are faithfully resampled over  
286 the time period of interest. Limiting the upper window to  $t \leq T - 30$  ensures we are using  
287 appropriately smoothed samples that are sufficiently informed by data.

## 288 3 Supplementary Results

### 289 3.1 Synthetic Verification of Hidden State Estimates

290 Before analysing real-world data, we performed synthetic tests to verify our model. We imposed  
291 a prescribed time-varying reproduction number and CAR and ran a forward simulation of our  
292 model to calculate the median number of infections, cases and wastewater data for a fixed value  
293 of  $\alpha$ . We then used the simulated case and wastewater data as inputs to the particle filter to  
294 estimate  $R_t$  and  $CAR_t$ . To investigate how the addition of wastewater data affected model  
295 performance, we ran the particle filter with three different sets of inputs: only case data, only  
296 wastewater data, and both case and wastewater data. The results are shown in Figure S2.  
297 The parameters used were  $\sigma_R = 0.1$ ,  $\sigma_{CAR} = 0.02$ ,  $k_c = 100$ , and  $k_w = 1 \times 10^{-6}$  along with  
298  $\alpha = 3 \times 10^9$ .

299 All three data combinations resulted in a reasonable estimate of  $R_t$  (Figure S2). The model error  
300 was smallest when using both reported cases and wastewater data as input (root mean square  
301 error between the true solution and the median of the particle filter output was 3.4 and 0.7  
302 times larger when only using reported cases or wastewater data, respectively). Previous work  
303 has estimated  $R_t$  from reported case data [12]. The results presented in Figure S2 demonstrate  
304 that  $R_t$  can also be estimated from wastewater data independently from case data and that the  
305 most accurate result is achieved by combining reported case information with wastewater data.

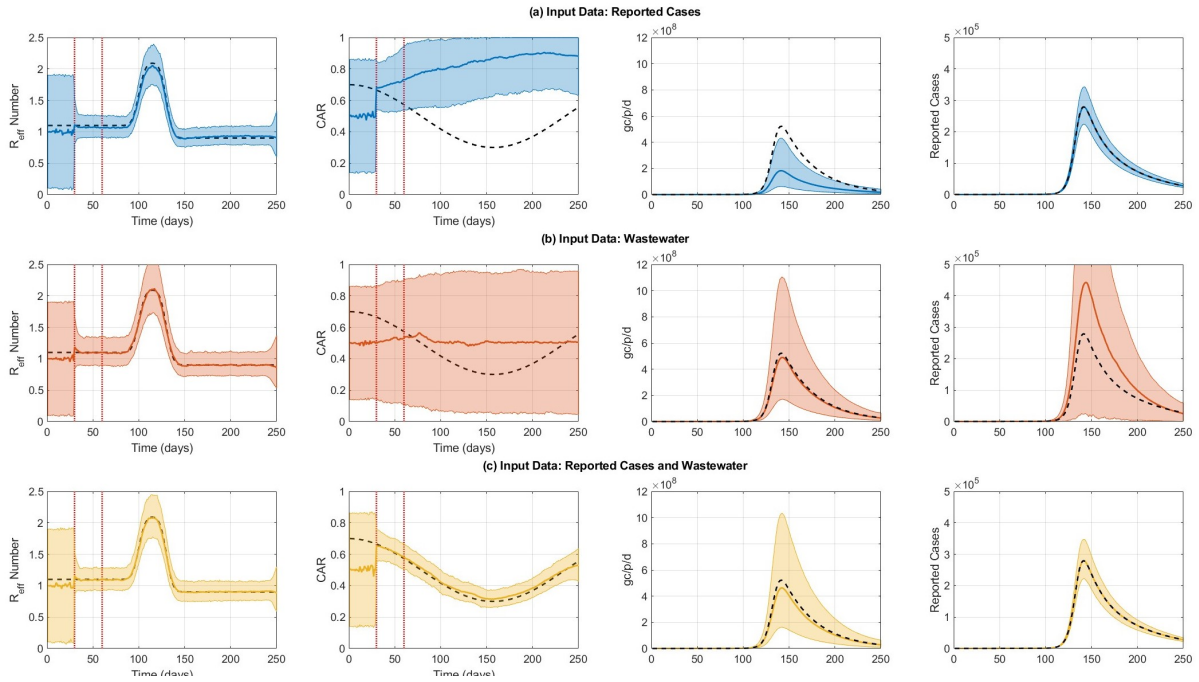

Figure S2: Synthetic results showing (left) instantaneous reproduction number, (centre-left) case ascertainment rate, (centre-right) wastewater data in genome copies per person per day (gc/p/d) and (right) reported cases. Results are shown when using (a) only reported cases as input data for the particle filter, (b) only wastewater data, and (c) both reported cases and wastewater data. Solid lines present central estimates. Shaded regions show 95% CrIs on the value of the hidden states (left and centre-left columns) and 95% CrIs on the prediction distribution for wastewater data and reported cases (centre-right and right columns). Black dashed lines indicate the synthetic data. Vertical red lines in hidden state plots (left and centre-left columns) indicate the end of the two wind-in periods (see Supplementary Materials sec. 2.2).

306 For CAR, there were significant differences between the three different sets of input data (Fig-  
 307 ure S2). When using only reported cases or wastewater data separately, the model did not have  
 308 sufficient information to inform estimates of CAR. As a consequence, estimates were either  
 309 inaccurate or did not capture the temporal trend and had very wide credible intervals. When  
 310 reported case information was combined with wastewater data, there was good agreement be-  
 311 tween the estimated CAR and the true solution, with a relatively narrow credible interval. This  
 312 illustrates the value of combining wastewater data with reported case information to obtain  
 313 reliable estimates of changes in CAR over time.

### 3.2 Visualising Log-Likelihood Estimates

As discussed in section 2.6, we simulated the model likelihood on a coarse grid of parameter values to get a preliminary estimate of the plausible range of parameter values. We present examples of two outputs in figure S3. The left-plot shows log-likelihood estimates for  $\sigma_R$  for the third estimation window (1 July 2022 to 30 September 2022) while the right-plot shows a bivariate heatmap of log-likelihood estimate for  $\sigma_{CAR}$  and  $k_c$ . Code to reproduce these figures is provided in the *usefulscripts* subfolder at <https://github.com/nicsteyn2/NZWastewaterModelling>.

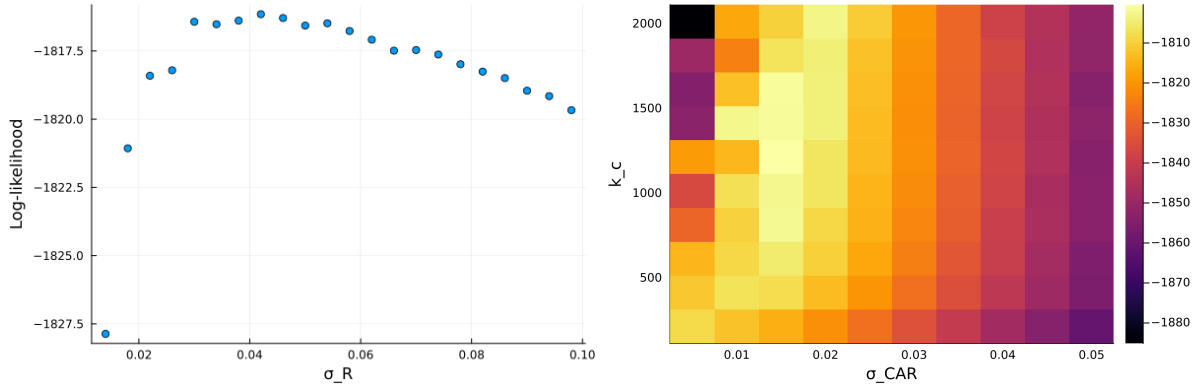

Figure S3: Log-likelihood estimates for various values of  $\sigma_R$  (left) and various combinations of values of  $\sigma_{CAR}$  and  $k_c$  (right).

### 3.3 Sensitivity to Delay Distributions

The model relies upon three distributions describing the delay from infection to reporting, shedding detected viral genome copies, and infecting other people. We test the effect of shifting these distributions by one day backward or forward. We do this by appending a zero at the start (to shift times backward), or by removing the first entry in  $d$  (to shift times forward), where  $d_i$  is the probability vector specifying the likelihood the delay takes  $i$  days. This has the effect of shifting the mean of the distributions by approximately one day in either direction.

Figures S4 to S6 show the effect of these shifts to be minimal, with the exception of the shedding distribution, where shifts can substantially impact estimates of the absolute case ascertainment rate, even though the relative case ascertainment rate is similar despite the shifts.

Note, due to computational limitations we do not re-fit fixed parameters for each shift, although the effect of doing this is expected to be negligible.

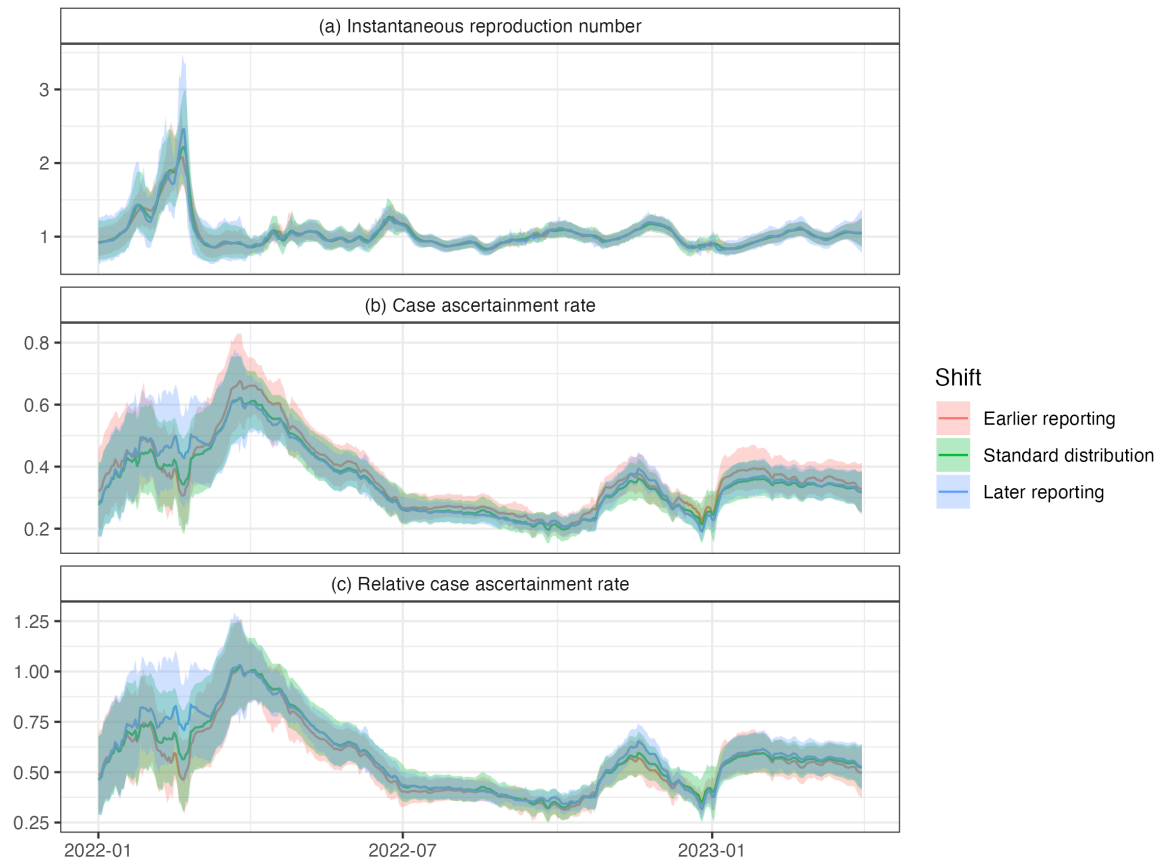

Figure S4: The effect of shifting the reporting time distribution by one day forward or backward.



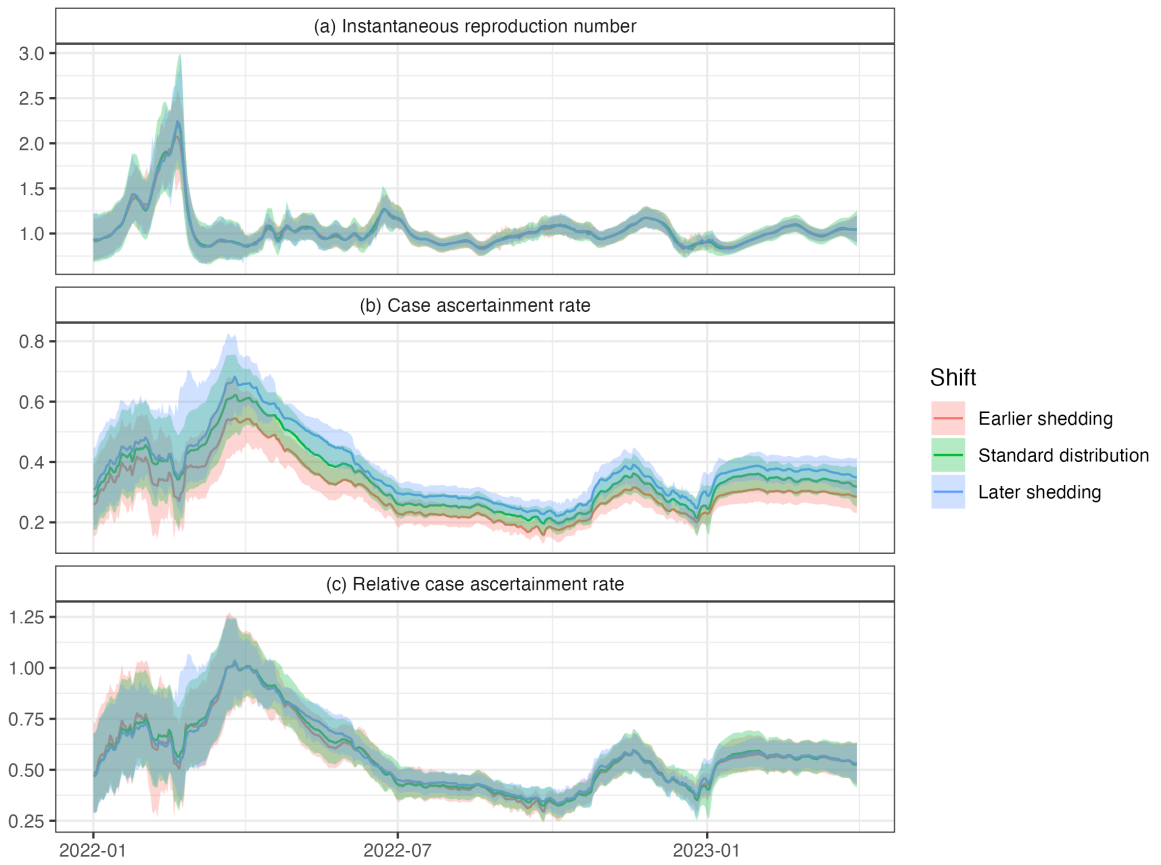

Figure S5: The effect of shifting the shedding time distribution by one day forward or backward.

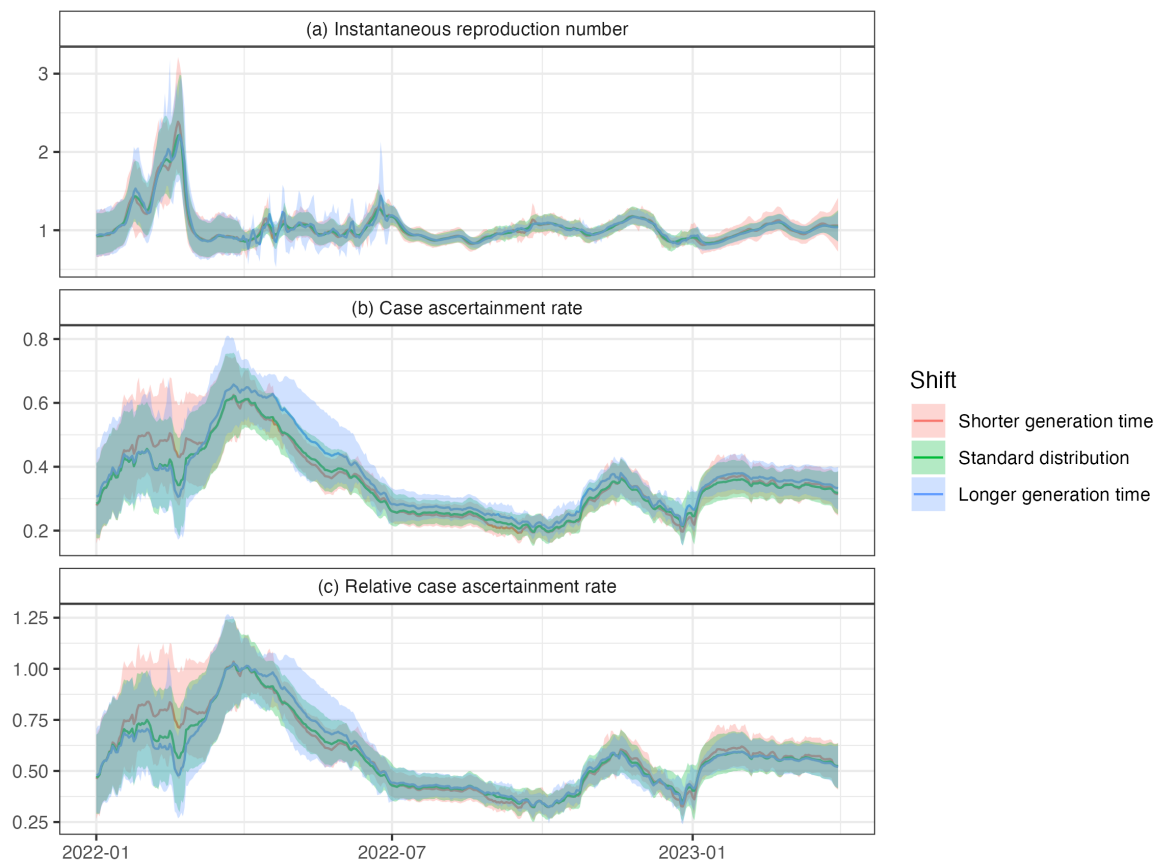

Figure S6: The effect of shifting the generation time distribution by one day forward or backward.

## 333 4 Particle Marginal Metropolis-Hastings Outputs

334 This section presents the trace plots, pairwise scatterplots of samples, pairwise correlations of  
 335 samples, univariate kernel density plots, and the Gelman-Rubin diagnostic for each of the four  
 336 parameters over the five three-month time periods in which they are estimated. Each of the  
 337 eight chains were run for 5,000 iterations, with the initial 100 samples dropped as a wind-in  
 338 period (although as discussed in section 2.6, our initial choices of parameter values mean this  
 339 is somewhat superfluous).

340 The Gelman-Rubin diagnostic tests for convergence by comparing intra-chain variance with  
 341 inter-chain variance. We use the *coda* package in R [13] to calculate a point estimate and 95%  
 342 upper confidence bound on the Gelman-Rubin diagnostic. It is generally accepted that values  
 343 less than 1.1 imply convergence, although some use the more relaxed cutoff of 1.2. These are  
 344 reported in table S3.

Table S3: Gelman-Rubic diagnostics and total sample sizes (for all eight chains) for each parameter and time period.

| Period starting | $\sigma_R$  | $\sigma_{CAR}$ | $k_c$       | $k_w$       | Sample size |
|-----------------|-------------|----------------|-------------|-------------|-------------|
| 1 Jan 2022      | 1.01 (1.01) | 1.01 (1.02)    | 1.01 (1.01) | 1.00 (1.02) | 39,200      |
| 1 Apr 2022      | 1.00 (1.01) | 1.01 (1.06)    | 1.01 (1.02) | 1.01 (1.02) | 39,200      |
| 1 Jul 2022      | 1.01 (1.02) | 1.01 (1.02)    | 1.01 (1.03) | 1.01 (1.01) | 39,200      |
| 1 Oct 2022      | 1.01 (1.02) | 1.01 (1.04)    | 1.02 (1.04) | 1.00 (1.01) | 39,200      |
| 1 Jan 2023      | 1.02 (1.04) | 1.02 (1.05)    | 1.04 (1.09) | 1.01 (1.03) | 39,200      |

345 4.1 Period 1: 1 January 2022 – 31 March 2022

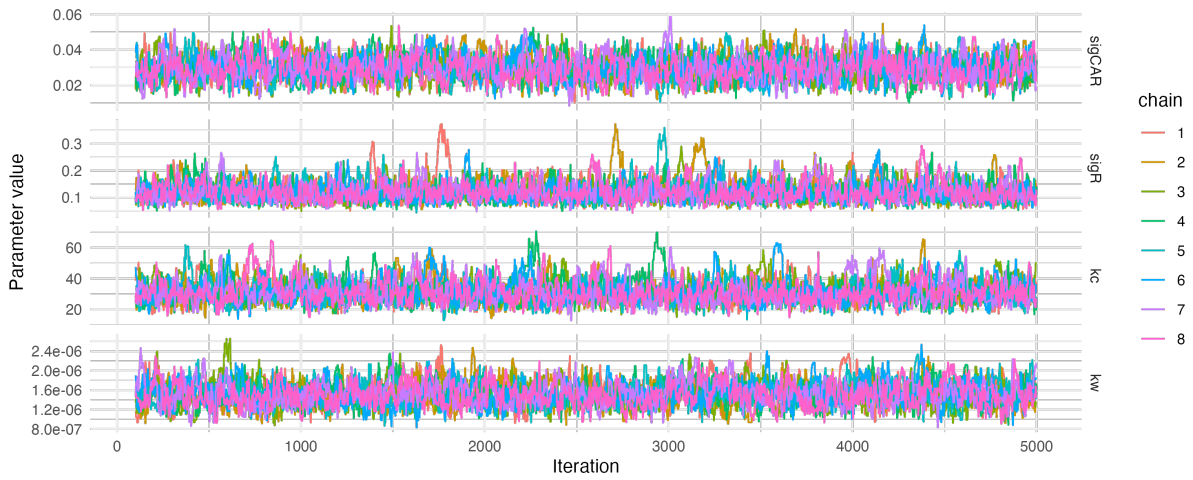

Figure S7: MCMC trace plots for period 1.

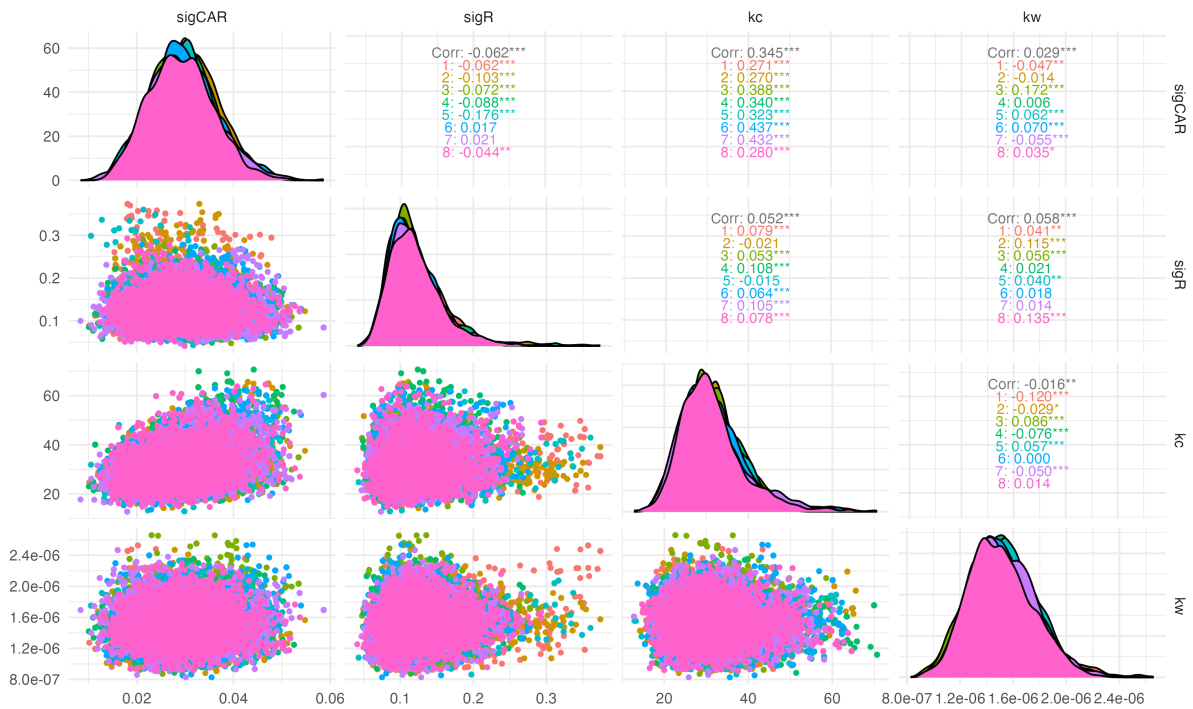

Figure S8: MCMC pairwise scatter plots, univariate kernel densities, and pairwise correlation estimates for period 1.

346 4.2 Period 2: 1 April 2022 – 30 June 2022

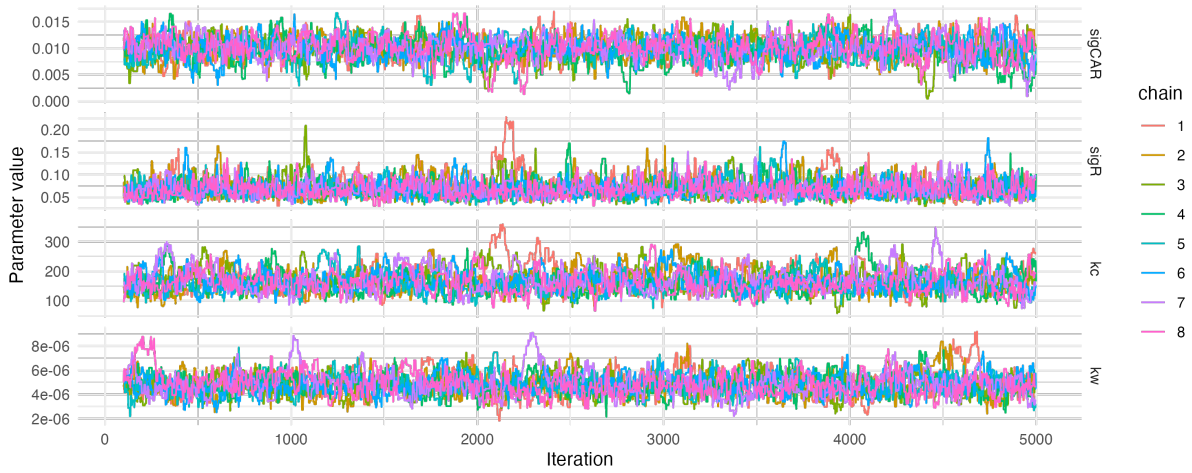

Figure S9: MCMC trace plots for period 2.

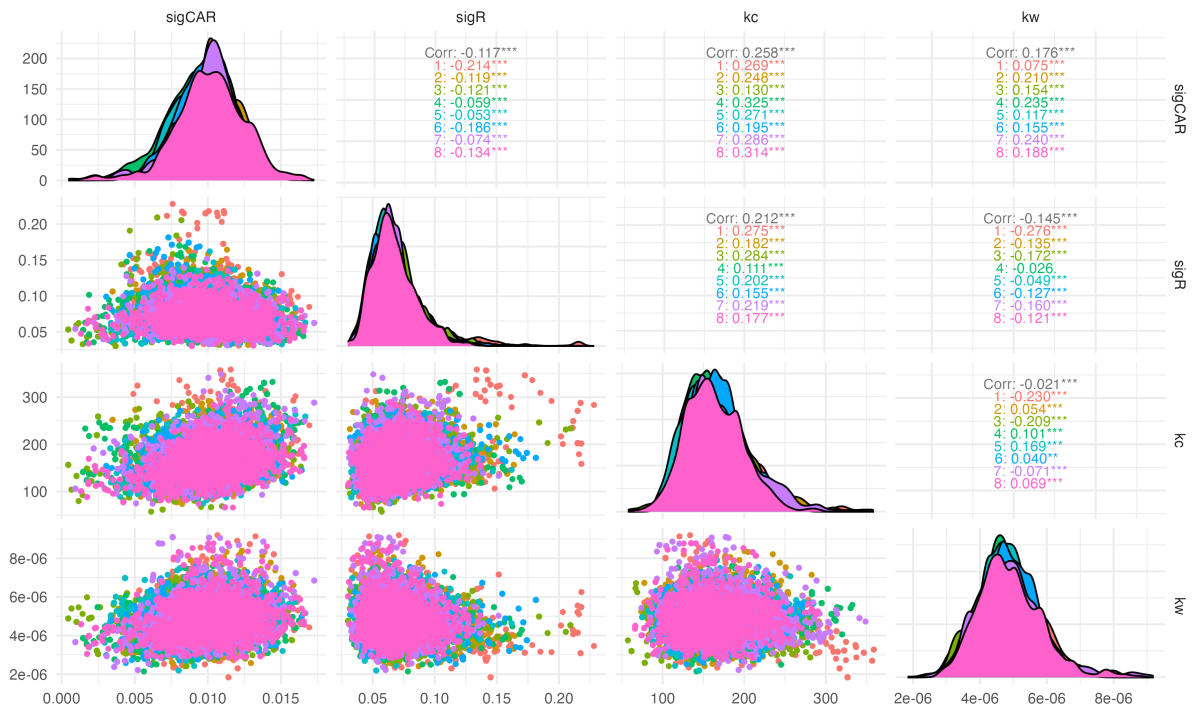

Figure S10: MCMC pairwise scatter plots, univariate kernel densities, and pairwise correlation estimates for period 2.

347 4.3 Period 3: 1 July 2022 – 30 September 2022

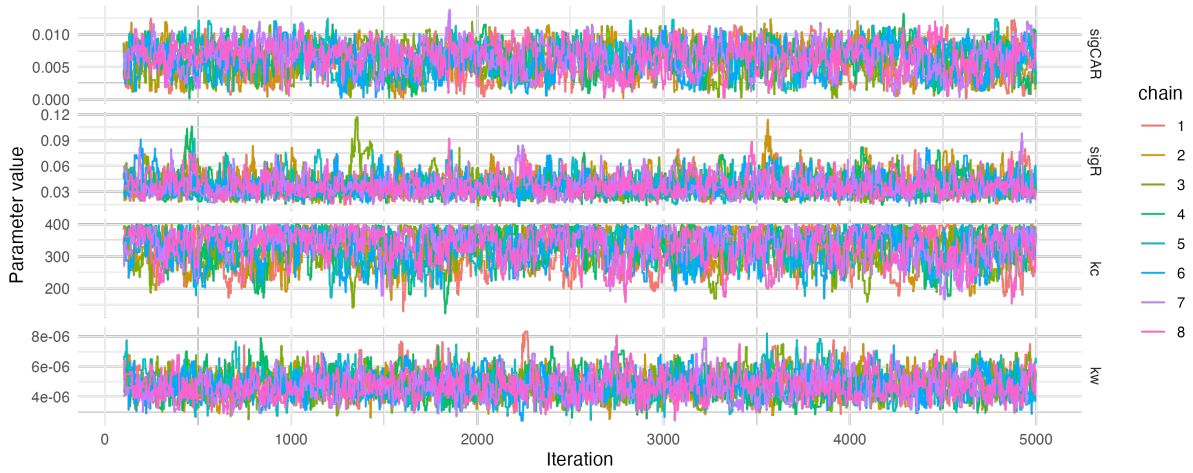

Figure S11: MCMC trace plots for period 3.

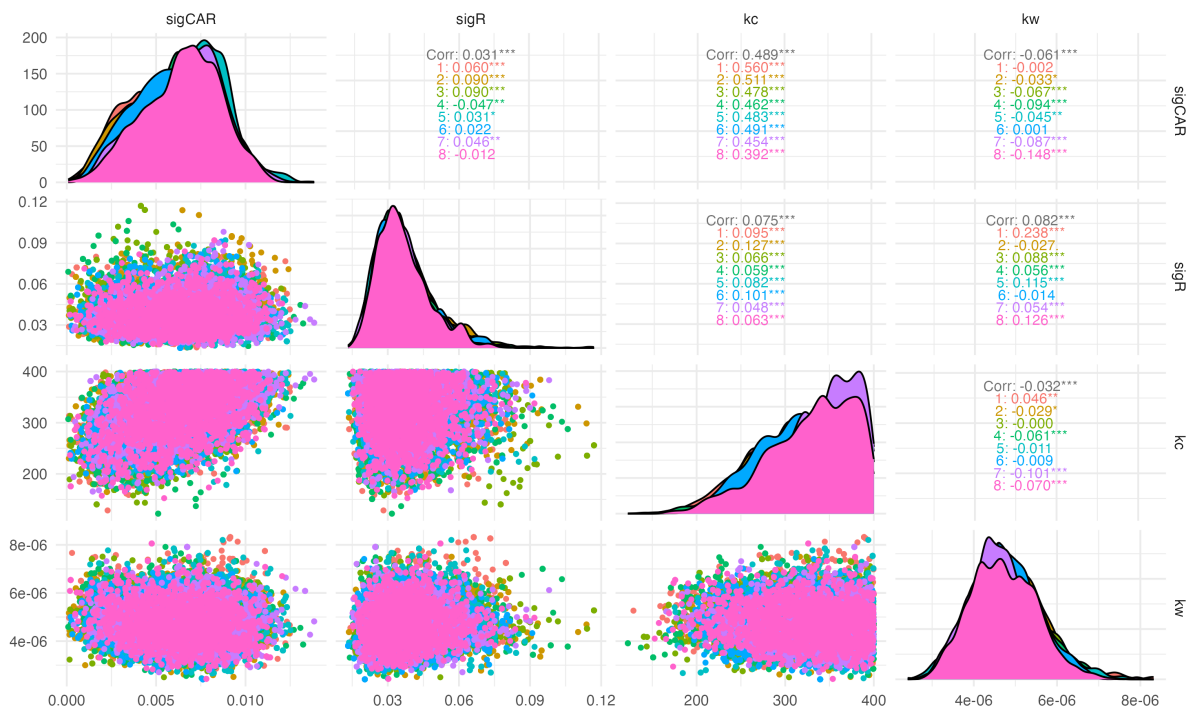

Figure S12: MCMC pairwise scatter plots, univariate kernel densities, and pairwise correlation estimates for period 3.

348 4.4 Period 4: 1 October 2022 – 31 December 2022

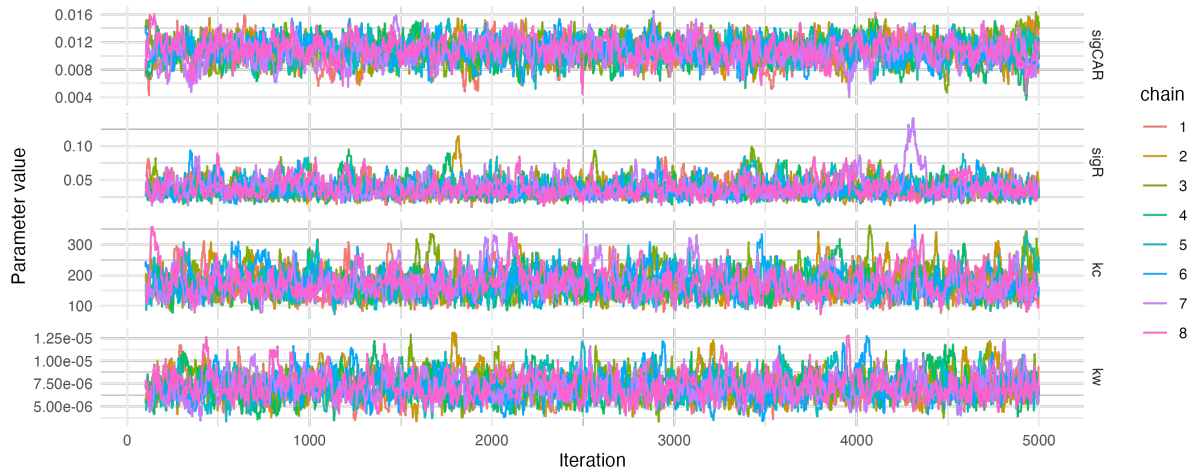

Figure S13: MCMC trace plots for period 4.

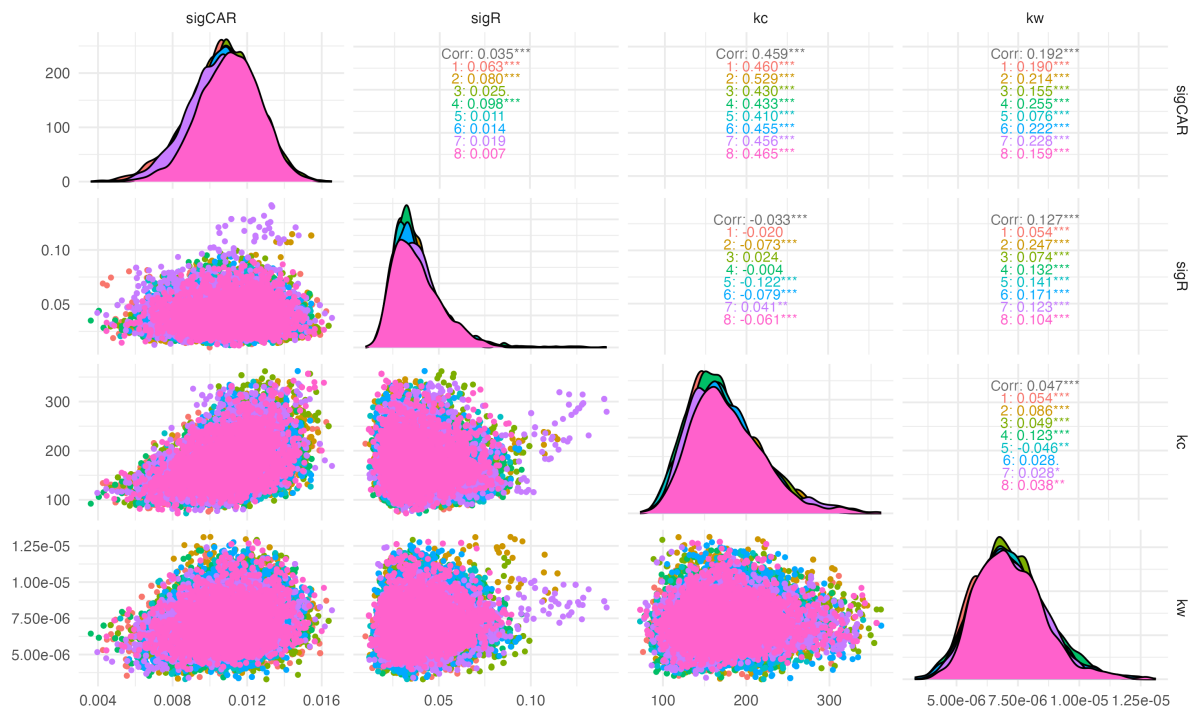

Figure S14: MCMC pairwise scatter plots, univariate kernel densities, and pairwise correlation estimates for period 4.

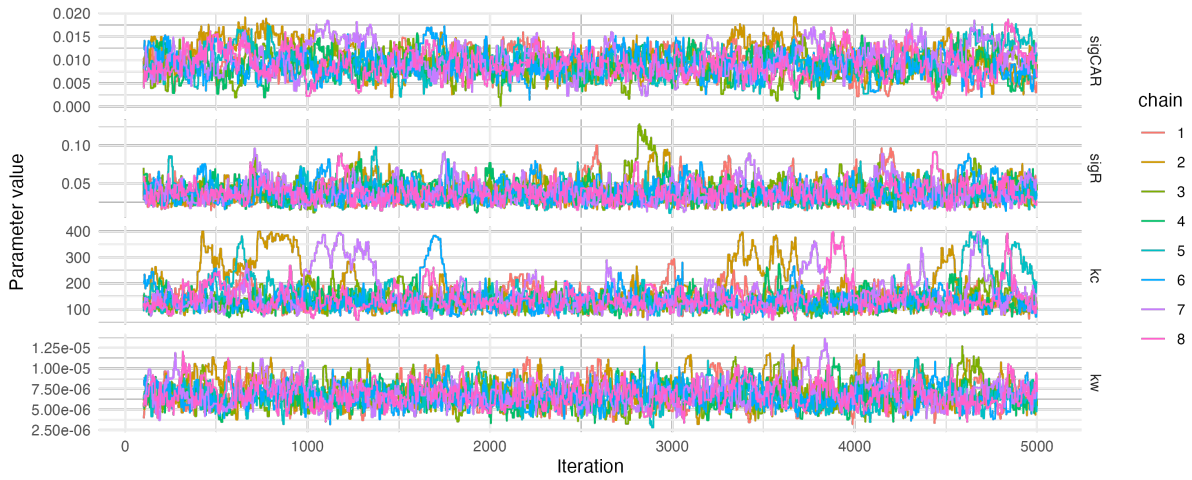

Figure S15: MCMC trace plots for period 5.

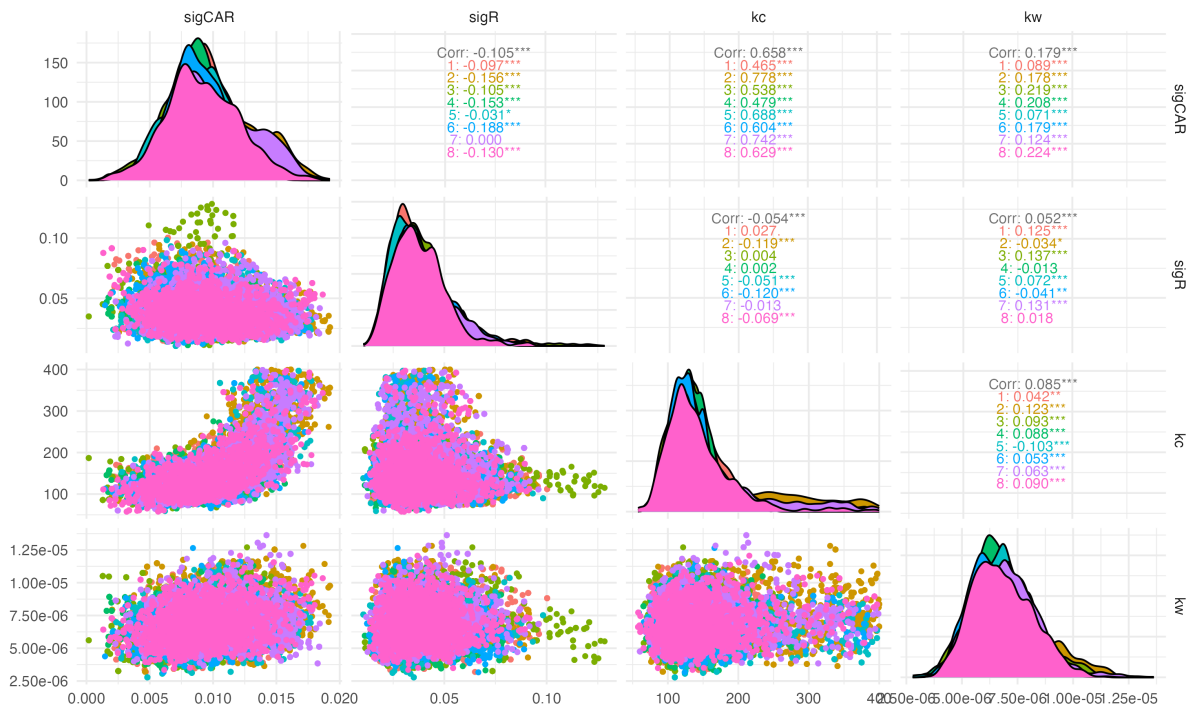

Figure S16: MCMC pairwise scatter plots, univariate kernel densities, and pairwise correlation estimates for period 5.



## References

- [1] Joanne Hewitt, Sam Trowsdale, Bridget A. Armstrong, Joanne R. Chapman, Kirsten M. Carter, Dawn M. Croucher, Cassandra R. Trent, Rosemary E. Sim, and Brent J. Gilpin. Sensitivity of wastewater-based epidemiology for detection of SARS-CoV-2 RNA in a low prevalence setting. *Water Research*, 211:118032, 3 2022.
- [2] ESR. COVID-19 Data Repository by the Institute of Environmental Science and Research, 2023.
- [3] Ministry of Health. COVID-19 data for New Zealand, 2023.
- [4] Giorgia Vattiatio, Audrey Lustig, Oliver J. Maclaren, and Michael J. Plank. Modelling the dynamics of infection, waning of immunity and re-infection with the Omicron variant of SARS-CoV-2 in Aotearoa New Zealand. *Epidemics*, 41:100657, 12 2022.
- [5] Christophe Andrieu, Arnaud Doucet, and Roman Holenstein. Particle Markov chain Monte Carlo methods. 72(3):269–342.
- [6] Nikolas Kantas, Arnaud Doucet, Sumeetpal S. Singh, Jan Maciejowski, and Nicolas Chopin. On Particle Methods for Parameter Estimation in State-Space Models. 30(3).
- [7] Sam Abbott, Katharine Sherratt, Moritz Gerstung, and Sebastian Funk. Estimation of the test to test distribution as a proxy for generation interval distribution for the Omicron variant in England. *medRxiv*, 1 2022.
- [8] Kimihito Ito, Chayada Piantham, Hiroshi Nishiura, Kimihito Ito, Chayada Piantham, and Hiroshi Nishiura. Estimating relative generation times and reproduction numbers of Omicron BA.1 and BA.2 with respect to Delta variant in Denmark. *Mathematical Biosciences and Engineering* 2022 9:9005, 19(9):9005–9017, 2022.
- [9] Dasom Kim, Sheikh Taslim Ali, Sungchan Kim, Jisoo Jo, Jun Sik Lim, Sunmi Lee, and Sukhyun Ryu. Estimation of Serial Interval and Reproduction Number to Quantify the Transmissibility of SARS-CoV-2 Omicron Variant in South Korea. *Viruses* 2022, Vol. 14, Page 533, 14(3):533, 3 2022.
- [10] Jantien A. Backer, Dirk Eggink, Stijn P. Andeweg, Irene K. Veldhuijzen, Noortje van Maarseveen, Klaas Vermaas, Boris Vlaemynck, Raf Schepers, Susan van den Hof, Chantal B.E.M. Reusken, and Jacco Wallinga. Shorter serial intervals in SARS-CoV-2 cases with Omicron BA.1 variant compared with Delta variant, the Netherlands, 13 to 26 December 2021. *Euro Surveillance*, 27(6), 2 2022.

- 381 [11] Jonas L Juul, Kaare Græsbøll, Lasse Engbo Christiansen, and Sune Lehmann. Fixed-time  
382 descriptive statistics underestimate extremes of epidemic curve ensembles. *Nature physics*,  
383 17(1):5–8, 2021.
- 384 [12] Sam Abbott, Joel Hellewell, Robin N. Thompson, Katharine Sherratt, Hamish P. Gibbs,  
385 Nikos I. Bosse, James D. Munday, Sophie Meakin, Emma L. Doughty, June Young Chun,  
386 Yung-Wai Desmond Chan, Flavio Finger, Paul Campbell, Akira Endo, Carl A. B. Pearson,  
387 Amy Gimma, Tim Russell, Stefan Flasche, Adam J. Kucharski, Rosalind M. Eggo, and  
388 Sebastian Funk. Estimating the time-varying reproduction number of SARS-CoV-2 using  
389 national and subnational case counts. *Wellcome Open Research*, 5:112, 12 2020.
- 390 [13] Martyn Plummer, Nicky Best, Kate Cowles, Karen Vines, Deepayan Sarkar, Douglas Bates,  
391 Russell Almond, and prefix=coda author useprefix=false family=details, given=Arni Mag-  
392 nusson. Coda: Output Analysis and Diagnostics for MCMC.
